1 **Compound stimuli reveal the structure of visual motion selectivity**  
2 **in macaque MT neurons**

3 **Abbreviated title: Compound stimuli reveal motion selectivity in MT**

4

5 Andrew D Zaharia<sup>1,2,†</sup>, Robbe L T Goris<sup>1,‡</sup>, J Anthony Movshon<sup>1</sup>, and Eero P Simoncelli<sup>1,2</sup>

6 <sup>1</sup>Center for Neural Science, New York University, New York, NY 10003

7 <sup>2</sup>Howard Hughes Medical Institute, New York, NY 10003

8 **Present address:**

9 <sup>†</sup>Zuckerman Mind Brain Behavior Institute, Columbia University

10 <sup>‡</sup>Center for Perceptual Systems, University of Texas at Austin

11 **For correspondence:**

12 Andrew Zaharia, Zuckerman Mind Brain Behavior Institute, 3227 Broadway, New York, NY 10023;

13 [zaharia@cns.nyu.edu](mailto:zaharia@cns.nyu.edu)

14 Eero Simoncelli, Center for Neural Science, New York, NY 10003; [eero.simoncelli@nyu.edu](mailto:eero.simoncelli@nyu.edu)

15

16 **Number of pages:** 55

17 **Number of figures/tables:** 11/0 (2/1 extended)

18 **Number of words:**

19 Abstract: 150/250, Significance statement: 116/120, Introduction: 638/650, Discussion: 1451/1500

20 **Conflicts of interest:** The authors declare no competing financial interests.

21 **Acknowledgements:** We thank Romesh Kumbhani, Michael Gorman, Najib Majaj, and other

22 members of the Movshon Laboratory for help with physiological experiments.

## 23 **Abstract**

24 Motion selectivity in primary visual cortex (V1) is approximately separable in orientation, spatial  
25 frequency, and temporal frequency (“frequency-separable”). Models for area MT neurons posit  
26 that their selectivity arises by combining direction-selective V1 afferents whose tuning is orga-  
27 nized around a tilted plane in the frequency domain, specifying a particular direction and speed  
28 (“velocity-separable”). This construction explains “pattern direction selective” MT neurons, which  
29 are velocity-selective but relatively invariant to spatial structure, including spatial frequency, tex-  
30 ture and shape. Surprisingly, when tested with single drifting gratings, most MT neurons’ responses  
31 are fit equally well by models with either form of separability. However, responses to plaids (sums  
32 of two moving gratings) tend to be better described as velocity-separable, especially for pattern  
33 neurons. We conclude that direction selectivity in MT is primarily computed by summing V1  
34 afferents, but pattern-invariant velocity tuning for complex stimuli may arise from local, recurrent  
35 interactions.

## 36 **Significance Statement**

37 How do sensory systems build representations of complex features from simpler ones? Visual  
38 motion representation in cortex is a well-studied example: the direction and speed of moving  
39 objects, regardless of shape or texture, is computed from the local motion of oriented edges. Here  
40 we quantify tuning properties based on single-unit recordings in primate area MT, then fit a novel,  
41 generalized model of motion computation. The model reveals two core properties of MT neurons —  
42 speed tuning and invariance to local edge orientation — result from a single organizing principle:  
43 each MT neuron combines afferents that represent edge motions consistent with a common velocity,  
44 much as V1 simple cells combine thalamic inputs consistent with a common orientation.

## 45 Introduction

46 Most neurons in extrastriate area MT (V5) are tuned for the speed and direction of visual motion  
47 (Dubner and Zeki, 1971; Van Essen et al., 1981; Maunsell and Van Essen, 1983), and many of  
48 them are selective for the coherent motion of complex patterns (Movshon et al., 1985). Such  
49 tuning is absent from the earliest stages of visual processing in primates, the retina and lateral  
50 geniculate nucleus. There, incoming visual signals are filtered without regard to direction, and  
51 are approximately separable in space and time (Enroth-Cugell et al., 1983; Derrington and Lennie,  
52 1984). Motion-selective simple cells in primary visual cortex (V1) are tuned for motion in a manner  
53 that treats spatial and temporal frequency roughly separably (Tolhurst and Movshon, 1975), while a  
54 quarter of V1 complex cells treat them jointly (Priebe et al., 2006), consistent with speed tuning. V1  
55 neurons provide input to MT, where neurons also tend to be speed tuned (Perrone and Thiele, 2001;  
56 Priebe et al., 2003).

57 Motion-selective V1 neurons are also orientation-selective, and their responses confound the  
58 direction of motion and the orientation of moving stimuli. In particular, they respond independently  
59 to each oriented component rather than to the pattern as a whole (Movshon et al., 1985). Under  
60 many conditions, humans perceive such complex patterns as moving coherently in a single direction  
61 (Wallach, 1935; Adelson and Movshon, 1982). Similarly, MT neurons signal coherent pattern  
62 motion, with some neurons being completely invariant to component orientation (Movshon et al.,  
63 1985). The degree to which MT neurons respond to the motion of individual components or the  
64 whole pattern lies on a continuum, quantified by a “pattern index” (see figure 1(a-c), Methods, and  
65 Movshon et al. (1985)).

66 Speed tuning and pattern motion selectivity in MT were typically studied separately. Further-  
67 more, previous studies in MT were performed in at most two of three dimensions: spatial and

68 temporal frequency (Perrone and Thiele, 2001; Priebe et al., 2003; Priebe et al., 2006), or direction  
69 and speed (Rodman and Albright, 1987). Recently, Nishimoto and Gallant (2011) and Inagaki et  
70 al. (2016) quantified MT selectivity in all three dimensions simultaneously, but did not relate their  
71 findings to pattern motion selectivity.

72 The Simoncelli and Heeger (1998) model of MT motion computation proposes that speed tuning  
73 and pattern motion selectivity both emerge from selective weighting of V1 afferents, parameterized  
74 in all three frequency dimensions. The model posits that MT neurons sum responses of V1 neurons  
75 whose preferred stimuli are consistent with a common velocity. MT neurons could, however, sum  
76 V1 afferents whose preferences share a common temporal frequency.

77 Here, we unify previous theory and experimental data in a coherent framework, by modifying  
78 the Simoncelli and Heeger (1998) model to allow direct fitting to electrophysiological recordings.  
79 Specifically, we compared the two hypotheses of MT computation above in their ability to explain  
80 the responses of neurons in areas V1 and MT of anesthetized and awake macaques to a large  
81 collection of sinusoidal gratings and plaids (superimposed gratings with different orientations and  
82 temporal frequencies). We fit these responses with a linear-nonlinear model of MT computation, in  
83 which the MT receptive field was constructed by summing velocity-specific or temporal frequency-  
84 specific combinations of V1 afferents. We refer to the former model variant, in which selectivity to  
85 spatial and temporal frequency varies jointly, as the *velocity-separable* model, and the latter model  
86 as the *frequency-separable* model. Nearly all V1 neurons were better described by the frequency-  
87 separable model. When probed with drifting sinusoidal gratings, MT responses were equally well-  
88 described by both models. However, when probed with plaid stimuli, the velocity-separable model  
89 systematically outperformed the frequency-separable model for pattern-selective neurons. This is  
90 the first direct evidence establishing speed tuning and pattern motion selectivity in area MT as

91 consequences of a single organizing principle: selectivity organized along a preferred velocity plane.

## 92 **Materials and Methods**

### 93 **Anesthetized recording procedures**

94 We recorded from 7 anesthetized, paralyzed, adult male macaque monkeys (*M. fascicularis*) and  
95 one adult female macaque (*M. mulatta*) using standard procedures for surgical preparation and  
96 single-unit recording, as described previously (Cavanaugh et al., 2002). We maintained anesthesia  
97 and paralysis by intravenously infusing sufentanil citrate ( $6\text{-}30 \mu\text{g kg}^{-1} \text{h}^{-1}$ ), and vecuronium  
98 bromide (Norcuron,  $0.1 \text{ mg kg}^{-1} \text{h}^{-1}$ ), respectively, in isotonic dextrose-Normosol solution ( $4\text{-}10 \text{ mL}$   
99  $\text{kg}^{-1} \text{h}^{-1}$ ). Vital signs (heart rate, lung pressure, electroencephalogram (EEG), electrocardiogram  
100 (ECG), body temperature, urine flow and osmolarity, and end-tidal  $\text{CO}_2$  partial pressure ( $\text{pCO}_2$ ))  
101 were continuously monitored and maintained within appropriate physiological ranges. Atropine  
102 was applied topically to dilate the pupils. Gas-permeable contact lenses protected the eyes, which  
103 were refracted with supplementary lenses chosen by direct ophthalmoscopy. Experiments typically  
104 lasted 5-7 days at the end of which the monkey was killed with an overdose of sodium pentobarbital.  
105 We conducted all experiments in compliance with the US National Institutes of Health Guide for  
106 the Care and Use of Laboratory Animals and with the approval of the New York University Animal  
107 Welfare Committee.

108 The monkey was positioned so his eyes were 57-114 cm from the display. Grating and plaid  
109 stimuli each lasted for 1,000 ms and were presented in randomly interleaved blocks. We used  
110 quartz-platinum-tungsten microelectrodes (Thomas Recording) to make extracellular recordings in  
111 the brain through a craniotomy and small durotomy. For each isolated unit, we determined eye  
112 dominance and occluded the non-preferred eye. While isolating neurons in V1 for recording, we

113 selected those with strong direction tuning.

## 114 **Awake recording procedures**

115 We also recorded from 2 awake, actively fixating, adult male macaques (one *M. mulatta* and one  
116 *M. nemestrina*). A headpost was surgically implanted for head stabilization using the design and  
117 methods described in (Adams et al., 2007). In a second surgical procedure, a chamber was implanted  
118 for chronic electrode recording over the superior temporal sulcus (STS) of the left hemisphere, using  
119 the techniques and a variant of the design described in (Adams et al., 2011). Prior to surgery, we  
120 used structural MRI and Brainsight software (Rogue Research, Canada) to design a chamber with  
121 legs matched to the curvature of the monkey's skull (Johnston et al., 2016) above the STS.

122 We acclimated each monkey to his recording chair and experimental surroundings. After this  
123 initial period, he was head-restrained and rewarded for looking at the fixation target with dilute  
124 juice or water. Meanwhile, we used an infrared eye tracker (EyeLink 1000; SR Research, Canada)  
125 to monitor eye position at 1000Hz via reflections of infrared light on the cornea and pupil. The  
126 monkey sat 57 cm from the display.

127 The monkey initiated a trial by fixating on a small white spot (diameter  $0.1^\circ$ ), after which he  
128 was required to maintain fixation for a random time interval between 2,350 and 4,350 ms. A grating  
129 or plaid stimulus would appear 100 ms after fixation began and last for 250 ms. Stimulus conditions  
130 were presented in randomly interleaved blocks. The monkey was rewarded if he maintained fixation  
131 within  $1\text{-}1.75^\circ$  from the fixation point for the entire duration of the stimulus. No stimuli were  
132 presented during the 300 to 600 ms in which the reward was being delivered. If the monkey broke  
133 fixation prematurely, the trial was aborted, a timeout of 2,000 ms occurred, and no reward was  
134 given.

135 We used tungsten microelectrodes (FHC, Bowdoin, ME) to make extracellular recordings. We

136 identified area MT from gray matter-white matter transitions and isolated neurons' brisk, direction-  
137 selective responses.

## 138 **Visual stimulation**

139 We presented visual stimuli on a gamma-corrected CRT monitor (an Eizo T966 during anesthetized  
140 experiments, and an HP P1230 during awake experiments; mean luminance, 33 cd/m<sup>2</sup>) at a reso-  
141 lution of 1,280 × 960 with a refresh rate of 120 Hz. Stimuli were generated and presented on an  
142 Apple Mac Pro using Expo software (<http://corevision.cns.nyu.edu>).

143 For each isolated unit, we presented windowed sinusoidal grating stimuli to determine, by hand,  
144 initial estimates of each cell's receptive field and preferred size. We used a standard sequence of  
145 tuning experiments to make precise estimates of the cell's tuning preferences. Each tuning curve  
146 measured in this sequence featured 100% contrast single gratings varying along a single stimulus  
147 dimension, beginning with size tuning and followed by direction, spatial frequency, and temporal  
148 frequency tuning. After each of these individual tuning experiments finished, we determined the  
149 preferred stimulus value of the dimension tested and used it in subsequent experiments. Next, we  
150 measured pattern direction selectivity, at optimal spatial and temporal frequencies, with interleaved  
151 drifting gratings and plaids. In the rare cases in which this experiment yielded a different grating  
152 direction preference from the previously determined value, we repeated the full sequence of tuning  
153 curve measurements, to make sure optimal values would be used for the single component and  
154 planar plaid experiments which followed. The receptive fields of all recorded neurons were centered  
155 between 2° and 30° from the fovea.

156 Next, we ran the planar plaid study, which required no further stimulus optimization. In the  
157 planar plaid study, stimuli were chosen to span four different direction tuning curves at the optimal  
158 spatial frequency (see figure 7(a,b)). The first two were based on single gratings at 50% contrast, one

159 with temporal frequency held constant at the optimal value (“constant frequency”), presented in all  
160 directions in  $30^\circ$  intervals, and the other with constant, optimal velocity (“constant velocity”) from  
161  $-90^\circ$  to  $90^\circ$  relative to the preferred direction, in  $15^\circ$  intervals. Since a given velocity corresponds  
162 to spectral content lying on a tilted plane in frequency space, constant velocity gratings had a  
163 temporal frequency that varied with the cosine of their direction.

164 The last two tuning curves consisted of  $120^\circ$  “plaids” (sums of two gratings with orientations  
165  $120^\circ$  apart). The component gratings had the same temporal frequency, and were presented at 50%  
166 contrast each. The “pattern direction” of motion (direction consistent with rigid translation, equal  
167 to the average direction of the two gratings) was sampled the same set of directions used for single  
168 grating tuning curves.

169 Following the planar plaid study, we ran the single component study. It included presentation  
170 of 225 drifting grating stimuli, each at 100% contrast. Stimuli were arranged to widely sample  
171 the three dimensions of spatiotemporal frequencies near a given neuron’s tuning preferences, using  
172 multiple tuning curves, each varying along a single dimension: direction, spatial frequency, and  
173 temporal frequency. These tuning curves were measured at optimal and suboptimal values, the  
174 latter of which were determined by reading out (or if necessary, linearly interpolating) the stimulus  
175 values which elicited a response at half the neuron’s maximum spike rate in the preceding standard  
176 tuning curve experiments (see extended data table 4-1 for details). By sampling spatiotemporal  
177 frequencies in this way, we could efficiently concentrate stimuli to reveal subtle changes of each  
178 neuron’s selectivity in a manner that does not assume a particular shape of selectivity or manner  
179 of tuning specific to either V1 or MT.

180 Note that the first two direction tuning curves of the single component study differ from the two  
181 grating tuning curves in the planar plaid study in that in the latter study: (1) gratings were at 50%



182 contrast instead of 100%, and (2) constant frequency gratings spanned the whole range of directions  
183 rather than just the semicircle of directions centered at the preferred one. Even though gratings  
184 were only presented at 50% contrast in the planar plaid study, its implications for 3D frequency  
185 selectivity shape should generalize to the 100% contrast case, since differences in response strength  
186 for these contrast levels are negligible (Carandini et al., 1997; Sclar et al., 1990).

## 187 Frequency- and velocity-separable models

188 The MT linear weighting functions for both the frequency- and velocity- based models are defined as  
189 a separable product of tuning functions over direction  $w_d(d)$ , spatial frequency  $w_s(s)$ , and temporal  
190 frequency  $w_t(t)$ .

191 Specifically, the frequency-separable linear weighting for a grating is defined as follows:

$$F(d, s, t) = w_d(d) \cdot w_s(s) \cdot w_t(t). \quad (1)$$

192 Direction tuning above is represented by a von Mises function:

$$w_d(d) = \frac{e^{\sigma_d \cos(d - \mu_d)}}{2\pi I_0(\sigma_d)}, \quad (2)$$

193 where  $\mu_d$  and  $\sigma_d$  represent the direction preference and bandwidth, respectively, and  $I_0()$  is the  
194 modified Bessel function of order 0 (which normalizes the integral of the numerator). Spatial  
195 frequency is represented by a logNormal function, parameterized by spatial frequency preference  
196  $\mu_s$  and bandwidth  $\sigma_s$ :

$$w_s(s) = \frac{1}{\sigma_s \sqrt{2\pi}} e^{-(\log_2(s) - \log_2(\mu_s))^2 / 2\sigma_s^2}. \quad (3)$$

197 Finally, temporal frequency is represented by a Gaussian in coordinates which are linear at low  
198 frequencies and logarithmic at higher ones:

$$w_t(t) = \frac{1}{\sigma_t \sqrt{2\pi}} e^{-(g(t) - g(\mu_t))^2 / 2\sigma_t^2}, \quad (4)$$

199 where  $g(t)$  is

$$g(t) = \text{sgn}(t) \log_2 \left( \frac{|t|}{\tau} + 1 \right). \quad (5)$$

200 Using this functional form for temporal frequency tuning allows  $w_t(t)$  to be logarithmic at high  
201 temporal frequencies, but also be zero-valued and continuous at zero temporal frequency. The  
202 parameter  $\tau$  determines the temporal frequency at which the function transitions from linear to  
203 logarithmic, and  $\mu_t$  and  $\sigma_t$  are the temporal frequency preference and bandwidth, respectively.

204 The velocity-separable linear weighting function is defined as follows:

$$V(d, s, t) = w_d(d) \cdot w_s(s) \cdot v_t(t; d, s), \quad (6)$$

205 where the velocity-separable temporal frequency function,  $v_t$ , is defined as a Gaussian, again linear  
206 at low frequencies and logarithmic at higher ones:

$$v_t(t; d, s) = \frac{1}{\sigma_t \sqrt{2\pi}} e^{-(g(t) - g(P(d, s)))^2 / 2\sigma_t^2} \quad (7)$$

207 The only difference between  $w_t(t)$  (equation (4)) and  $v_t(t; d, s)$  (equation (7)) is that in the latter,  
208 temporal frequency tuning is centered on the preferred speed plane  $P(d, s)$ :

$$P(d, s) = s \frac{\mu_t}{\mu_s} \cos(d - \mu_d). \quad (8)$$

209 Note that a consequence of equations (6)-(8) is that the velocity-separable model “shears” vertically  
210 in the direction of the temporal frequency axis, rather than in the direction orthogonal to the  
211 preferred velocity plane (see figure 1). This was done deliberately, to account for the broad temporal  
212 frequency tuning MT neurons exhibit near the preferred direction and spatial frequency (see figures  
213 4 and 8).

214 Previous models included a V1 normalization stage, either explicitly or implicitly simulated, at  
215 this part of the computation (Simoncelli and Heeger, 1998; Rust et al., 2006; Nishimoto and Gallant,

216 2011). Normalization at the V1 stage has been previously shown to be an important contributor  
217 to MT tuning properties. While we could have made it an explicit piece of the model here, Rust  
218 et al. (2006) showed that, in some cases, it can be combined with the MT normalization stage to  
219 yield a single normalization computation. Moreover, V1 contrast normalization is engaged only  
220 when contrast varies widely, and cross-orientation suppression is strongest for components close  
221 in orientation. Since the grating components in the plaid stimuli in our experiments are always  
222 50% contrast and 120° apart, we assume such cross-orientation and contrast normalization effects  
223 in V1 are negligible. Thus, we assume the next model stage consists of MT neurons summing the  
224 responses to each plaid component.

225 Finally, the full MT model response is computed by raising the linear responses to a power  $\beta$ ,  
226 and then normalizing them:

$$\begin{aligned} R_f(d, s, t, t_{max}) &= \alpha_0 + \frac{\alpha_1 n^{(1-2\beta)/3} (\sum_i^n F_i(d, s, t))^\beta}{\alpha_2 + \sum_i^n N_i(t, t_{max})} \\ R_v(d, s, t, t_{max}) &= \alpha_0 + \frac{\alpha_1 n^{(1-2\beta)/3} (\sum_i^n V_i(d, s, t))^\beta}{\alpha_2 + \sum_i^n N_i(t, t_{max})} \end{aligned} \quad (9)$$

227 where the sums are over the components of the stimulus ( $n = 2$  for plaids,  $n = 1$  for gratings),  
228 and the  $\alpha_0$  and  $\alpha_1$  parameters represent the spontaneous and maximum discharge rates of the cell.  
229 The relative gains of responses to grating and plaid are controlled by the  $n^{(1-2\beta)/3}$  term in the  
230 numerator in equation (9).

231 The normalization signal,  $N_i(t, t_{max})$ , is meant to approximate the effects of tuned normaliza-  
232 tion. In the original Simoncelli and Heeger cascade model, MT normalization signals were computed  
233 by summing over a simulated population of MT neurons, but this construction would be computa-  
234 tionally prohibitive in the context of fitting the model to spiking data. We parameterize the tuning

235 as follows:

$$N_i(t_i, t_{max}) = (1 - \gamma_0) \left(1 - \frac{t_i}{t_{max}}\right)^{\gamma_1} + \gamma_0. \quad (10)$$

236 This function is maximally active at zero temporal frequency (with a value of 1) and minimally  
237 active with a value of  $\gamma_0$  at  $t_{max}$ .  $t_{max}$  is the highest temporal frequency simulated and experimen-  
238 tally presented. We used this form of normalization for fitting tractability and because it has useful  
239 properties, namely, it: (1) ensures there is no suppression at the preferred temporal frequency, (2)  
240 can be completely disabled by setting  $\gamma_0 = 1$ , and (3) can be sub-linear, linear, or super-linear.

241 The rationale for this particular approximation of MT tuned normalization is based on the fol-  
242 lowing thought experiment. We start with the assumption that neurons in the MT normalization  
243 pool fall into component-, intermediate-, and pattern-selective subpopulations (see figure 1(c)).  
244 Next, we assume all neurons' selectivities in each of these subpopulations evenly tile the space  
245 of spatiotemporal frequencies. Now we will consider the consequences of summing together the  
246 spatiotemporal frequency selectivities of all the neurons in each subpopulation. Specifically, the  
247 manner in which these selectivities sum together and overlap each other in frequency space de-  
248 termine whether and how normalization is tuned. Any systematic biases in tuning overlap, as a  
249 function of spatiotemporal frequency, yield tuned normalization.

250 Component neurons from both model variants have narrow tuning, overlapping only between  
251 neurons with adjacent spatiotemporal tuning preferences. As a consequence, the summed responses  
252 of the population of component neurons evenly tile frequency space, producing an untuned nor-  
253 malization signal.

254 Frequency-separable pattern-selective neurons have broad direction tuning, so their overlap will  
255 occur most strongly in direction. The overlap, however, will be separable in spatial and temporal

256 frequency, so for any subpopulation with the same spatial and temporal frequency tuning at all  
257 directions, the overlap will be confined to a donut-shaped region centered on those spatial and  
258 temporal frequencies. Since we assume the population of frequency-separable pattern selective  
259 neurons are evenly distributed across all preferred spatial and temporal frequencies, the tuning  
260 overlap will also be evenly distributed, yielding an untuned normalization signal.

261 Finally, velocity-separable pattern-selective neurons, which are organized along tilted planes  
262 which pass through the origin, will have strong overlap at zero and low temporal frequencies re-  
263 gardless of their preferred direction. As such, a pool of velocity-separable pattern neurons tiling  
264 frequency space generate a tuned normalization signal which strongly emphasizes low/zero temporal  
265 frequency. The same conclusions can be drawn for intermediate neurons in each separable model,  
266 although their selectivities will overlap less, yielding a similar, but weaker, tuned normalization  
267 signal.

## 268 **Estimating model parameters for individual cells**

269 In total, the model has 9 free parameters for the single-grating study and 10 for the planar plaid  
270 study. For the former, they are: the direction preference and bandwidth ( $\mu_d$  and  $\sigma_d$ ), spatial  
271 frequency preference and bandwidth ( $\mu_s$  and  $\sigma_s$ ), temporal frequency preference, bandwidth, and  
272 log-linear transition ( $\mu_t$ ,  $\sigma_t$ , and  $\tau$ ), and the spontaneous and maximum firing rates ( $\alpha_0$  and  $\alpha_1$ ).  
273 For the latter experiment,  $\mu_s$ ,  $\sigma_s$ , and  $\mu_t$  are unconstrained by the data and are therefore held  
274 fixed at experimentally determined values, but the exponent ( $\beta$ ), semi-saturation constant ( $\alpha_2$ ),  
275 and normalization parameters ( $\gamma_0$  and  $\gamma_1$ ) are free. To avoid model fits producing spuriously wide  
276 temporal frequency tuning, we included temporal frequency tuning data collected immediately prior  
277 in the fitting of the planar plaid dataset. That temporal frequency tuning data, along with the  
278 planar plaid stimuli which sample different directions, constrain  $\mu_d$ ,  $\sigma_d$ , and  $\sigma_t$ . In each study,

279 the frequency- and velocity-separable models have the same parameters, and only differ in the  
280 parameterization of their temporal frequency linear weighting functions,  $w_t$  and  $v_t$  (see equations  
281 (4) and (7)).

282 For each cell, we optimized the model parameters by minimizing the negative log-likelihood  
283 (NLL) over the observed data, assuming spike counts arise from a modulated Poisson model. An  
284 additional parameter,  $\sigma_G$ , describes across-trial fluctuations in neural response gain (Goris et al.,  
285 2014) and was optimized to the data independently from the frequency- and velocity-separable  
286 models and held constant during model fitting. We performed the optimization in successive steps,  
287 using optimal values from one step as initialization values for the next. First, we fit  $\tau$ , then added  
288 the rest of the MT linear weighting parameters, and then in the case of the planar plaid experiment,  
289 the MT parameters controlling the MT nonlinearity.

## 290 **Experimental design and statistical analysis**

291 In the single component study, we recorded single-unit responses of 13 V1 neurons and 39 MT  
292 neurons from seven anesthetized, paralyzed, adult male macaque monkeys (*M. fascicularis*) and  
293 one adult female macaque (*M. mulatta*). From those same eight monkeys, we recorded 21 V1  
294 neurons and 54 MT neurons for the planar plaid study. We additionally recorded 58 MT neurons  
295 from two awake, actively fixating, adult male macaques for the planar plaid study (31 from *M.*  
296 *mulatta* “monkey A” and 28 from *M. nemestrina* “monkey LW”). For 29 of the 53 MT neurons  
297 recorded under anesthesia in the planar plaid study, the single component study was also run. All  
298 of the 13 V1 neurons from the single component study are in the set of 21 V1 neurons in the planar  
299 plaid study. In all studies, neurons were only excluded from analysis if spike isolation degraded  
300 during the experiment, or if spike rates were too low (e.g., always below 10 spikes/sec) or variable  
301 to reliably predict direction tuning. No additional neurons were rejected from any subsequent

302 analyses.

303 Following stimulus onset, we counted spikes within a 1,000 ms window (anesthetized experi-  
304 ments) or a 250 ms window (awake experiments). For each cell, latency of these windows (relative  
305 to stimulus onset) were chosen by by maximizing the sum of response variances computed for each  
306 stimulus condition (Smith et al., 2005). Error bars on tuning curve responses indicate  $\pm 1$  standard  
307 deviation.

308 We used standard methods to compute each cell’s “pattern index” (Movshon et al., 1985;  
309 Smith et al., 2005). First, we computed partial correlations between the actual (constant temporal  
310 frequency) plaid responses and idealized predictions of pattern and component direction selectivity  
311 ( $r_p$  and  $r_c$ , respectively). We then converted these values to Z-scores to stabilize the variances of the  
312 correlations ( $Z_p$  and  $Z_c$ ). Finally, the pattern index is the difference of these two quantities:  $Z_p - Z_c$ .  
313 Cells were classified as pattern selective if  $Z_p - Z_c > 1.28$ , or component-selective if  $Z_c - Z_p > 1.28$ .  
314 Both thresholds correspond to a significance of  $P = 0.90$ . Confidence intervals on pattern index  
315 were computed from the 95th percentile of 100 bootstrapped estimates (Efron and Tibshirani, 1993;  
316 Rust et al., 2006).

317 For optimal and non-optimal spatial and temporal frequency tuning curves in the single com-  
318 ponent study in figure 2(b-d), we fit a difference of log2-Gaussians (Hawken et al., 1996). For each  
319 neuron, the stimulus value corresponding to the peak of this fitted difference of log2-Gaussians  
320 function was used as the fitted preferred stimulus in the figure. To test the robustness of these  
321 tuning curve fits, we ran a bootstrap analysis in which trials from each tuning curve were pseudo-  
322 randomly resampled 1000 times, with replacement, with the restriction that no stimulus condition  
323 had zero trials sampled. The error bars in figure 2(b-d) represent the 95% confidence intervals of  
324 these bootstrapped fitted peak stimulus values. Some tuning curves had flat tops, yielding unreli-

325 able tuning preference estimates. We therefore excluded neurons (7 MT, 0 V1) from all analyses  
326 in figure 2(b-d) which had a confidence interval exceeding 1.5 decades in any of the three. The  
327 conclusions are the same with or without these neurons.

328 For the constrained parameter search during model fitting, we used a simplex algorithm (the  
329 Matlab function ‘fmincon’). To avoid overfitting and obtain estimates of parameter stability (i.e.,  
330 the error bars in figures 9(a,b) and 10), we fit the model on 100 bootstrap resamplings of the data.  
331 Bootstrapping was done on a per stimulus-condition basis—that is, trials within each stimulus  
332 condition were sampled with replacement, ensuring that there were no stimulus conditions without  
333 data. Error bars on model fits indicate  $\pm 1$  standard error.

334 To compare model fits to a given neuron, we computed “velocity superiority”, the difference of  
335 the normalized NLLs of the velocity- and frequency-separable models. The NLLs were normalized  
336 by their corresponding “null” and “oracle” models, which serve as lower and upper bounds, at 0  
337 and 1, respectively. The null model assumes the cell has two possible response rates: one when a  
338 stimulus is present and another when there is no stimulus. These are fixed to the measured mean  
339 spontaneous and maximal stimulus-driven response rates, respectively. The oracle model serves as  
340 an upper bound for the models’ performance, computed by using the measured mean responses  
341 to each stimulus condition to predict the neuron’s response to any individual presentation of that  
342 stimulus. We used the Wilcoxon signed rank test to test velocity superiority significance and  
343 Pearson’s  $r$  to assess correlation between velocity superiority and other quantities, such as pattern  
344 index.



## 345 **Results**

### 346 **Joint and independent representations of motion in the frequency domain**

347 Any image sequence can be decomposed (using a three-dimensional Fourier transform) into a sum  
348 of sinusoidal gratings of differing orientation, and spatial and temporal frequency. A single point  
349 in this 3D frequency domain corresponds to a drifting sinusoidal grating with a unique orientation,  
350 spatial frequency, and temporal frequency (figure 1(d)). More complex spatial patterns contain  
351 mixtures of gratings of different orientations and spatial frequencies. If these patterns are rigidly  
352 translating over time, their frequency domain constituents lie on a tilted plane through the origin,  
353 the slope of which is equal to the object's speed (figure 1(e); Watson and Ahumada (1983); Watson  
354 and Ahumada (1985)).

355 How do V1 and MT neurons represent visual motion? Most V1 neurons are selective for a  
356 relatively narrow range of orientations, and spatial and temporal frequencies, corresponding to a  
357 ball in the frequency domain (Goris et al., 2015). If MT neurons are specialized for analyzing rigid  
358 motion, their receptive fields should be organized along just such a plane with slope equal to a  
359 preferred speed (figure 1(f), “velocity-separable”) (Simoncelli and Heeger, 1998). While there is  
360 some direct physiological evidence for velocity-separable organization (Rodman and Albright, 1987;  
361 Perrone and Thiele, 2001; Priebe et al., 2003; Nishimoto and Gallant, 2011), as well as perceptual  
362 evidence (Adelson and Movshon, 1982; Schrater et al., 2000), this is not the only kind of receptive  
363 field organization consistent with known MT properties.

364 However, almost all experimental measurements of grating direction selectivity use stimuli that  
365 lie along a horizontal plane of constant temporal frequency. By treating spatial and temporal  
366 frequency independently, they implicitly assume that MT direction selectivity is organized along  
367 these planes (“frequency-separable,” figure 1(g)). Evidence exists for this alternative possibility

368 (Perrone and Thiele, 2001; Priebe et al., 2003)—an MT neuron with this type of organization  
369 would still be direction-selective, but in a manner that is more strongly influenced by variations in  
370 spatial pattern.

371 These two model structures make different, testable predictions about how MT tuning should  
372 change in response to preferred and non-preferred stimuli. Experimenters typically assess a neuron’s  
373 spatiotemporal frequency tuning preferences by presenting gratings varying along one of the three  
374 dimensions of the frequency domain, while keeping the values in the other two dimensions fixed  
375 at the best estimate of the neuron’s preferences (black lines in figure 1(h-i) for spatial frequency,  
376 temporal frequency, and direction, respectively). For a simulated neuron, the tuning curves (red  
377 and blue dashed lines in figure 1(j-k)) generated from these optimized stimuli have their peaks at  
378 the neuron’s preferred spatiotemporal frequency (represented as the black points in figure 1(h-i)).

379 The two predictions differ most for tuning curves measured at non-preferred frequencies (fig-  
380 ure 1(h-i), dark gray lines and points), most notably in the tuning curves’ peak locations. The  
381 frequency-separable hypothesis predicts tuning in response to stimuli of non-preferred spatial and  
382 temporal frequency that is lower in amplitude but with a peak at the same frequency (blue lines,  
383 figure 1(j-k)). However, the velocity-separable hypothesis predicts that the tuning curve will shift  
384 (red lines, figure 1(j-k)), such that if the non-preferred tuning experiment is run at a frequency  
385 below preferred, the peak will also be at a lower frequency, and vice-versa.

386 To test these hypotheses in V1 and MT, we measured tuning curves at optimal and suboptimal  
387 spatial and temporal frequencies and asked whether or not there was a shift in their peak location.  
388 For “suboptimal” frequencies, we used the stimulus values corresponding to the half-maximum  
389 responses when measured at optimal frequencies (see Methods for details). Many cells (e.g.,  
390 figure 2(a)), exhibited a peak spatial frequency tuning that increased with increases in grating

391 temporal frequency, consistent with the velocity-separable hypothesis. To quantify this shift, and  
392 compare across neurons, we computed the peak spatial frequency and plotted it as a function of  
393 the relative temporal frequency at which it was measured (figure 2(b)). The degree to which the  
394 neuron is velocity tuned can be captured by the slope of the line through the data (0 for no speed  
395 tuning, 1 for ideal speed tuning, 0.37 for the neuron in (a)). V1 neurons show, on average, no slope  
396 ( $0.08 \pm 0.22$  s.e.m.,  $n = 13$ , blue in figure 2(b)), while MT neurons have a significantly positive  
397 slope ( $0.50 \pm 0.07$  s.e.m.,  $n = 39$ , red in figure 2(b)). Performing the same analysis for changes  
398 in temporal frequency preferences as a function of stimulus spatial frequency (figure 2(c)) yields  
399 similar slopes in MT ( $0.36 \pm 0.03$  s.e.m.) and V1 ( $0.05 \pm 0.04$  s.e.m.).

400 These measurements, all performed at the neuron's preferred direction, support previous find-  
401 ings that V1 tends to be frequency-separable and MT velocity-separable (Simoncelli and Heeger,  
402 1998; Perrone and Thiele, 2001; Priebe et al., 2003; Priebe et al., 2006; Nishimoto and Gallant,  
403 2011). Since our goal was to characterize tuning in all three dimensions, we also assessed peak tem-  
404 poral frequency changes when measured at different directions (figure 2(d)), which should either  
405 remain constant or decrease (for the frequency- and velocity-separable hypotheses, respectively).  
406 When averaged across the populations, slopes were flat (figure 2(d), V1 (blue triangles) mean  
407  $-0.001 \pm 0.004$  s.e.m.; MT (red triangles) mean  $-0.0004 \pm 0.0007$  s.e.m.), however, on a neuron-by-  
408 neuron basis, tuning at non-preferred directions was inconsistent. To probe the three-dimensional  
409 selectivity more finely, we presented stimuli at many more spatiotemporal frequencies, and fit  
410 velocity- and frequency-separable models directly to the responses.

## 411 **The velocity- and frequency-separable models**

412 To examine MT receptive field organization in the frequency domain, we fit two modified versions  
413 of the Simoncelli and Heeger (1998) model of MT direction selectivity to the responses of individual

414 neurons. Both models have the same structure: two stages, each with a linear weighting followed by  
415 a point nonlinearity and normalization (figure 3). The first (V1) stage consists of narrowly-tuned  
416 direction-selective complex cells, simulated with a linear weighting of a narrow band of frequencies,  
417 followed by squaring. The second (MT) stage computes a weighted linear combination of its V1  
418 inputs, followed by another point nonlinearity and normalization.

419 Linear weighting in the MT stage is the primary determinant of the MT neuron's tuning proper-  
420 ties, including pattern motion selectivity. We constrain it to be a separable product of three tuning  
421 curves. The first two (direction and spatial frequency tuning) are common to both models. In the  
422 frequency-separable model, the third separable function is temporal frequency tuning, independent  
423 of the other two dimensions. In the velocity-separable model, temporal frequency tuning co-varies  
424 with direction tuning such that the peak lies on a tilted plane whose slope is the preferred velocity  
425 of the neuron. This temporal frequency tuning parameterization is the only difference between the  
426 two models.

427 The MT stage nonlinearity controls interactions between multiple spatiotemporal frequencies  
428 simultaneously present in the stimulus, and thus plays an important role in establishing pattern  
429 motion responses. In the full models, the MT nonlinearity is composed of a point-wise power  
430 function, followed by divisive normalization. The divisive normalization operates on a uniform  
431 population of pattern and component cells which, taken in aggregate, are assumed to uniformly  
432 cover direction and spatial frequency, while exhibiting tuning for temporal frequency (see Methods  
433 for details). Single grating stimuli do not constrain this model component, and thus for the single  
434 grating study presented below, the exponent is fixed to a value of two.

## 435 **Single grating responses do not differentiate the models**

436 How can we distinguish the two models? We designed a study in which we measured seventeen  
437 tuning curves, chosen on a neuron-by-neuron basis, to sample the frequency domain where the  
438 predictions of the models should deviate the most. The stimuli were full contrast sinusoidal gratings;  
439 five tuning experiments included a grating at the optimal spatiotemporal frequency, while twelve  
440 suboptimal tuning experiments did not (see methods and extended data figure 4-1 and table 4-1 for  
441 details). By comparing how responses fall off as stimuli deviate from the preferred spatiotemporal  
442 frequency, a picture of three-dimensional tuning should emerge in support of one model or the  
443 other.

444 For each cell, we fit the frequency and velocity models to data from all 17 tuning experiments  
445 simultaneously. Figure 4(a-d) shows four of the seventeen tuning curves of the optimized model,  
446 fit to data from two example MT component neurons (figure 4(a,b)) and two MT pattern neu-  
447 rons (figure 4(c,d)). As expected, the models make substantially different predictions for spatial  
448 and temporal frequency tuning (first three columns in figure 4), but not direction tuning (fourth  
449 column). In the first two columns, for example, the velocity model predicts tuning peak shifts,  
450 whereas the frequency model does not.

451 Most tuning curves from each neuron are well fit by one of the two models (frequency model  
452 for figure 4(a,c) and velocity model for figure 4(b,d)), including changes in relative gain across  
453 tuning experiments. Relative model performance for each stimulus condition from all seventeen  
454 tuning experiments (points in the scatter plots in figure 4, rightmost column) show that while some  
455 spatiotemporal frequencies strongly distinguish the two models, most do not. This reflects the  
456 fact that some tuning curves are well-described by both models (e.g., the constant-velocity grating

457 direction tuning, fourth column of figure 4).

458 This range of behavior was observed across the population. We assessed overall fit quality  
459 on a cell-by-cell basis by normalizing the log likelihoods of the models to null and oracle models.  
460 The null model assumes the cell has two possible response rates: one when a stimulus is present  
461 and another when there is no stimulus. These are fixed to the measured mean spontaneous and  
462 maximal stimulus-driven response rates, respectively. The oracle model serves as an upper bound  
463 for the models' performance, computed by using the measured mean responses to each stimulus  
464 condition to predict the neuron's response to any individual presentation of that stimulus. "Velocity  
465 superiority" is the difference of the normalized log likelihoods of the velocity-separable model and  
466 the frequency-separable model (figure 5).

467 In general, V1 cells were better fit by the frequency model (average velocity superiority of  $-0.03$ ,  
468  $P = 0.0046$  Wilcoxon signed rank test, open circles in figure 5). Most MT neurons were clearly  
469 better fit by one model or the other, but overall, neither model was significantly better ( $-0.005$   
470 mean difference,  $P = 0.12$  Wilcoxon signed rank test, filled circles in figure 5), regardless of pattern  
471 index.

472 Model fits to single grating responses provided further evidence that V1 neurons are frequency-  
473 separable, but were inconclusive for MT neurons. MT neurons tend to be velocity-separable for  
474 stimuli at the preferred direction (figure 2(b,c)) but have inconsistent tuning at off-directions (figure  
475 2(d)). In theory, comparing direction tuning curves measured at either a given neuron's optimal  
476 velocity or optimal temporal frequency should distinguish the models: they predict direction tuning  
477 bandwidth to be wider when the stimulus and model type match (e.g., velocity-separable model  
478 direction tuning for constant-velocity gratings should have a wider bandwidth than tuning for  
479 constant frequency gratings). In fact, measured tuning to these two stimuli are nearly identical for

480 component neurons, and slightly broader, on average, for constant velocity gratings for intermediate  
481 and pattern neurons (figure 6). These data provide more evidence that MT neurons are likely  
482 velocity-separable, using different tuning measurements at non-preferred directions.

483 Taking these observations into account, we concluded that single grating stimuli are not rich  
484 enough to fully distinguish the models. In particular, since only one spatiotemporal frequency is  
485 presented at a time, single gratings do not constrain the MT nonlinearity which underlies pattern  
486 computation. We therefore sought to use more complex stimuli and focused on sampling the  
487 frequency domain at non-preferred directions—those spatiotemporal frequencies which were the  
488 most informative in distinguishing the two models (both in theory and in practice).

### 489 **Compound stimuli reveal velocity-separable organization in MT**

490 Selectivity for pattern motion is a defining property of MT neurons. Since single gratings alone  
491 are not rich enough to characterize MT, we ran a second study in which direction tuning curves  
492 were measured for gratings and 120° plaids, presented either at a given neuron’s optimal velocity or  
493 optimal temporal frequency (figure 7(a,b)). All stimuli were fixed at the neuron’s optimal spatial  
494 frequency. These stimuli can be equivalently described as gratings and plaids drifting either in the  
495 preferred direction of the cell or along the direction normal to the mean orientation (“constant  
496 velocity” or “constant frequency” in figures 7(a) and (b), respectively).

497 The two models make dramatically different predictions (figure 7(c)) for pattern-selective neu-  
498 rons: the frequency model predicts tuning for constant-velocity plaids to have a trough at the  
499 preferred pattern motion direction, and peak 90° from preferred. The velocity model predicts a  
500 near-constant, elevated response to all constant-velocity plaids.

501 Responses to this new stimulus family were complex enough to fully constrain the models’ MT  
502 nonlinearity (a power function and divisive normalization—see methods for details). There were

503 three free parameters in the nonlinearity that were fixed in the previous study. Since the spatial  
504 frequency preference and bandwidth and temporal frequency preference parameters were uncon-  
505 strained by this dataset, they were fixed to values determined in preceding tuning measurements.  
506 In total, there was one additional free parameter fit compared to the single-grating study.

507 Qualitatively, the models predict that direction tuning should be flatter when the coordinate  
508 system of the model matches that of the stimuli. Two features of the measured responses stand out.  
509 First, constant frequency and constant velocity direction tuning curves to gratings are again clearly  
510 indistinguishable for all cells (two leftmost columns of figure 8). Second, the pattern selective MT  
511 neuron (figure 8(d)) exhibits much wider direction tuning bandwidth for constant velocity plaids as  
512 opposed to constant frequency plaids (fourth and third columns from the left in figure 8), while the  
513 other cells show more similar tuning bandwidth for the two plaid types. For all cells, both models  
514 capture grating responses well. However, the frequency model cannot account for the pattern  
515 selective neuron's responses to both types of plaids simultaneously (figure 8(d), blue). The best it  
516 can do is pick a compromise direction tuning bandwidth that is too wide for constant frequency  
517 plaids and too narrow for constant velocity plaids. The velocity model, on the other hand, is  
518 able to account for all the data simultaneously, including the different plaid tuning bandwidths.  
519 This pattern cell is the only one of the four example cells that has substantial differences in the  
520 frequency- and velocity-separable model predictions. The increasingly divergent model predictions  
521 as pattern index increases is further illustrated by the increasingly different MT linear weighting  
522 functions (rendered in the last column of figure 8). The models make nearly identical predictions  
523 for narrowly tuned neurons, yielding velocity superiority indices at or near 0 (scatter plots on right  
524 of figure 8).

525 The relationship between velocity superiority and pattern index holds across cell populations.



526 For the single grating data set, there is overall no significant correlation (figure 9(a), for all cells  
527 (Pearson's  $r = 0.05$ ,  $P = 0.70$ ) or MT alone ( $r = -0.01$ ,  $P = 0.95$ ). There was, however,  
528 a significant negative correlation for V1 ( $r = -0.70$ ,  $P = 0.007$ ). Furthermore, there was no  
529 significant relationship between pattern index and the number of tuning curves per cell better fit  
530 by one model or the other (Pearson's  $r = -0.22$ ,  $P = 0.13$ ). In contrast, responses to plaid stimuli  
531 indicate a significant correlation between velocity superiority and pattern index, and (figure 9(b),  
532 Pearson's  $r = 0.34$ ,  $P = 5.6e - 5$ ). 86% of all pattern cells were better fit by the velocity model  
533 ( $P = 1.4e - 4$ , Wilcoxon signed rank test).

534 As a more direct test, we compared pattern selectivity of model predictions against the mea-  
535 sured pattern selectivity of the cells. The velocity model accounts for the full range of pattern  
536 selectivity across the population (figure 9(c), Pearson's  $r = 0.60$ ). The frequency model, however,  
537 fails to produce any cells with pattern tuning (figure 9(d), Pearson's  $r = 0.50$ ), due to the com-  
538 promises it must make when fitting both constant frequency and constant velocity plaid responses  
539 simultaneously.

## 540 **Model validation**

541 Which characteristics are needed to describe the motion selectivity of a given neuron in MT?  
542 They are, in order of increasing complexity: (1) its preferred direction and speed, (2) the degree  
543 to which responses fall off as stimuli deviate from the preferred stimulus, and (3) the extent to  
544 which multiple overlapping motion components are treated independently or as a single, coherently  
545 moving pattern.

546 Experimentally, these attributes are established by identifying the stimulus that evokes the neu-  
547 ron's maximum response, the shape of tuning curves for direction, spatial frequency, and temporal  
548 frequency, and calculating the pattern index based on correlating (constant frequency) grating

549 and plaid direction tuning. The recorded direction curves we report (figure 8), with identical  
550 bandwidths for constant frequency and velocity gratings (all cells) and wider bandwidth tuning to  
551 constant velocity plaids (pattern cells), provide a novel fourth criterion for describing MT motion  
552 selectivity.

553 The velocity model accurately captures the first, second, and fourth attributes by accurately  
554 reproducing tuning curves (figures 4 and 8). We verified that the velocity model also accounts  
555 for the third attribute, and accounts for the full range of pattern selectivity across the population  
556 (figure 9(c)). The frequency model, in addition to failing on the second and fourth criteria (figure  
557 8), also fails on the third by failing to predict any pattern cells (figure 9(d)).

558 How does the velocity model provide a full account of motion selectivity? Capturing selectivity  
559 in all three frequency dimensions accounts for the first two attributes. Pattern selectivity, the third  
560 attribute, is controlled by increasing direction tuning bandwidth (Pearson's  $r = 0.73$ , figure 10(a))  
561 and the exponent in the nonlinearity (Pearson's  $r = 0.60$ , figure 10(b)). Divisive normalization,  
562 which allows the model to adjust the fourth attribute, does so by producing grating direction tuning  
563 curves with more similar bandwidths than would be predicted in its absence. The semi-saturation,  
564 or "uniform" divisive normalization parameter, is very weakly correlated with pattern index (on a  
565 log2 scale, Pearson's  $r = -0.16$ ,  $P = 0.07$ , figure 10(c), see methods for details). This means that  
566 for neurons with higher pattern index, the temporal-frequency dependent suppression is stronger.

## 567 **Motion computation in the velocity-separable model**

568 The separable models we developed and tested are generalizations of previous models (Simoncelli  
569 and Heeger, 1998; Rust et al., 2006). The Simoncelli and Heeger (1998) model was constructed  
570 using populations of V1 and MT neurons, each having their own rectifying nonlinearities and  
571 divisive normalization. The second (MT) stage of the model linearly weighted the afferent signals

572 from V1 along a tilted, constant velocity plane in the frequency domain. But this model was  
573 not explicitly fit to single cell data, and comparisons of predicted to measured tuning curves were  
574 qualitative. The Rust et al. (2006) paper used a simplified model variant that predicted (and was  
575 fit to) responses to gratings and plaids at a single temporal frequency. The paper showed that  
576 pattern selectivity could be explained by incorporating opponent suppression and direction-tuned  
577 normalization. By fitting to a more diverse set of stimuli, and a model that includes a full range  
578 of temporal frequencies, we find that selectivity for both speed and direction of moving patterns  
579 can be captured in a single model. Note that we have incorporated temporal frequency dependent  
580 normalization in the MT stage (as opposed to the direction-tuned normalization of the Rust et  
581 al. (2006) model). For parameter values optimized to neurons in the compound stimulus dataset,  
582 this tends to sharpen direction tuning for constant velocity gratings.

583 In order to characterize MT receptive field structure in all three dimensions of the frequency  
584 domain, it was not feasible to simulate entire populations of V1 and MT neurons. By restricting  
585 our stimuli to gratings and plaids which would not be affected by normalization in V1, we could  
586 avoid explicitly simulating the V1 stage. Rather, the model evaluated tuning directly based on the  
587 separable product of tuning curves along three dimensions in the frequency domain. Since all three  
588 tuning curves are exponential functions, the separable tuning volume and exponent approximately  
589 accounts for both the linear weighting stages and power function nonlinearities of V1 and MT.  
590 As a result, three computational elements, all implemented in the MT stage, determine how a  
591 given MT neuron responds to moving stimuli: linear weights, a point-wise power nonlinearity, and  
592 normalization.

593 The linear weights capture the first-order aspects of a given MT neuron's tuning: its tuning  
594 preferences and a coarse estimate of tuning breadth. In fact, both frequency- and velocity-separable

595 (“linear”) models can capture single grating tuning curve shape well. This is why the two separable  
596 models are indistinguishable, on average, when fit to the single grating dataset (figure 5). The  
597 model captures the continuum of selectivity for pattern motion in MT (characterized by a unimodal  
598 constant frequency plaid direction tuning curve, see figures 8(d) and 11(b)) by simply increasing the  
599 direction tuning bandwidth in the linear weights (Simoncelli and Heeger, 1998). Direction tuning  
600 bandwidth (calculated from measured tuning curves) is correlated with pattern index, as observed  
601 in our data (Pearson’s  $r = 0.27$ ,  $P = 0.0027$ ,  $n=112$ ) and previous studies (Pearson’s  $r = 0.35$ ,  
602  $P < 0.0002$ ,  $n=788$ , Wang and Movshon (2016)). Linear weighting alone in the velocity-separable  
603 model is sufficient to capture the unimodality of constant frequency plaid (pattern) direction tuning,  
604 but not in the frequency-separable model (lightest red and blue traces, respectively, in figure 11(a)).  
605 Further, the frequency-separable model severely underestimates constant velocity plaid responses  
606 (figure 11(b)). It is important to note that in order for the two separable models to make realistic  
607 and distinguishable predictions, temporal frequency tuning data were also included during fitting;  
608 all models capture this tuning well (figure 8). Ultimately, the “linear” model fails by overestimating  
609 the tuning bandwidth to frequency plaids (figure 11(a)).

610 The original Simoncelli and Heeger (1998) model solved this problem by applying an expansive,  
611 point-wise nonlinearity in the MT stage. The nonlinearity, when fit to data, only changes tuning  
612 to compound stimuli. By adding a point-wise power function, both separable “linear-nonlinear”  
613 (LN) model achieve better, sharper constant frequency plaid tuning (medium blue and red traces  
614 in figure 11(a)). Frequency-separable predictions to constant velocity plaids (medium blue in figure  
615 11(b)) however, worsen, since tuning for all mixture stimuli are sharpened by the power function.  
616 This model parameter is strongly correlated with measured pattern index (figure 10), indicating its  
617 role in pattern motion computation.

618 If the goal was simply to correctly reproduce direction tuning for constant frequency gratings and  
619 plaids, a separable model including linear weighting and a power function nonlinearity alone would  
620 be sufficient. However, the unexpected, nonlinear property of MT selectivity that we discovered is  
621 that direction tuning bandwidth is wider for constant velocity gratings than for constant frequency  
622 gratings (figure 6), but by much less than expected, and by much less than is the case for measured  
623 constant velocity plaid tuning (figure 8(d)). In order to account for this small change in grating  
624 tuning and large change in plaid tuning, the separable models require normalization at the MT  
625 stage.

626 We used a closed-form approximation of MT normalization, rather than simulating an entire  
627 population of MT neurons (as was done in the original Simoncelli and Heeger (1998) model, see  
628 methods for a details), to make model fitting tractable. Despite being an approximation, it is a  
629 functionally interpretable one. Its primary effect is to suppress responses at low temporal frequen-  
630 cies; its tuning relative to the linear weights is plotted in figure 11(c). Suppression for low temporal  
631 frequencies has been observed experimentally (Maunsell and Van Essen, 1983). Incorporating nor-  
632 malization improves contrast gain control (darkest blue and red tuning curves are better scaled to  
633 the data in figure 11(a,b)). This normalization also sharpens tuning to both single gratings and  
634 conjunctions of gratings by concentrating suppression at low temporal frequencies. In the case of  
635 pattern neuron responses, these conjunctions are components consistent with a preferred veloc-  
636 ity, so velocity-separable model predictions for constant velocity plaids are appropriately widely  
637 tuned (figure 11(b)) and frequency-separable model predictions for constant frequency plaids are  
638 too widely tuned (figure 11(a)).

639 For each nested version of the models, namely, the “linear,” “linear-nonlinear,” and the full  
640 model, the velocity-separable version performs better on pattern neurons as a group (figure 11(d)).

641 For component and intermediate neurons, the two types of model are indistinguishable regardless  
642 of model version.

643 Taken together, the two datasets and associated model fits reveal important aspects of MT  
644 computation. First, sinusoidal grating stimuli drifting in a neuron's preferred direction can reveal a  
645 frequency-separable receptive field organization in V1, and a velocity-separable one in MT. These  
646 stimuli, however, are not sufficient to reveal the nonlinear behaviors that distinguish direction  
647 selectivity observed in MT from that observed in V1. Second, compound stimuli, which constrain  
648 nonlinear receptive field behavior in MT, reveal receptive fields that are organized along a neuron's  
649 preferred velocity plane.

## 650 Discussion

651 To date, attempts to characterize MT motion selectivity have generally followed two distinct strate-  
652 gies. They focused either on how multiple superimposed spatiotemporal frequencies are integrated  
653 into a single, coherent drifting pattern, or on how tuning varies across multiple dimensions of the  
654 spatiotemporal frequency domain. Here, we present a model that unifies these two approaches in  
655 a common framework, and for the first time, generalizes previous findings to all three dimensions  
656 of the spatiotemporal frequency domain.

657 We recorded responses of a large population of neurons in both MT and V1 to simple stimuli  
658 specifically designed to extensively quantify tuning in the spatiotemporal frequency domain as well  
659 as tuning for pattern motion. We fit two compact two-stage models to each individual neuron  
660 in the population. We found temporal frequency tuning in MT to be much broader than that  
661 instantiated in the Simoncelli and Heeger (1998) model. Furthermore, by comparing two models'  
662 performance, we provide model-based evidence that MT neurons' selectivity is best described by

663 a tilted, constant velocity plane in the spatiotemporal domain. Finally, compound stimuli were  
664 necessary to reveal this organization—single sinusoidal gratings were not sufficient.

## 665 **Relationship to previous work**

666 Perrone and Thiele (2002) observed broader temporal frequency tuning than predicted by the  
667 Simoncelli and Heeger (1998) model. Their Weighted Intersection Mechanism (WIM) model was  
668 able to capture joint spatial and temporal frequency tuning in MT. It employed a weighting function  
669 on V1 inputs organized along a common speed, and only responded when two types of V1 inputs,  
670 “sustained” and “transient,” had equal response levels. With particular choices of parameters, the  
671 WIM model can also simulate pattern direction selectivity (Perrone, 2004). The authors stated  
672 that a model with velocity-based tuning at the MT stage, such as in Simoncelli and Heeger (1998),  
673 would not be capable of producing realistic spatiotemporal tuning. Here we fit just such a velocity-  
674 based separable model directly to pattern motion data and to data simultaneously spanning all  
675 three dimensions of frequency space. It achieved similar realism in reproducing tuning in both  
676 temporal frequency and pattern motion direction, each recorded from a heterogeneous populations  
677 of neurons, without the need for the two specific V1 neuron types.

678 Priebe et al. (2003) investigated joint tuning for spatial and temporal frequency and pat-  
679 tern motion selectivity in MT. Consistent with our findings, they reported stronger evidence  
680 for speed tuning with compound stimuli such as plaids or square-wave gratings, as compared  
681 to single sinusoidal gratings. Additionally, speed tuning for single sinusoidal gratings and de-  
682 gree of pattern selectivity were independent. They concluded that speed tuning arises in MT  
683 only when multiple spatial frequencies are present. Our findings are consistent with these con-  
684 clusions, and arise in our velocity-separable model simulations as a result of the MT normal-  
685 ization. Our model additionally predicts that pattern tuning will be correlated with speed tun-

686 ing for square wave gratings and random dots (Kumano and Uka, 2013; McDonald et al., 2014;  
687 Xiao and Huang, 2015).

688 More recent studies (Nishimoto and Gallant, 2011; Inagaki et al., 2016) have explored MT  
689 selectivity in all three dimensions of the frequency domain. Nishimoto and Gallant (2011) used  
690 “motion-enhanced” natural movies to visualize 3D spectral receptive fields of individual MT neu-  
691 rons for the first time. These weights followed a simulated V1 population, which performed linear  
692 filtering, a compressive nonlinearity, and divisive normalization. They reported weights with exci-  
693 tation organized along a partial ring on the plane, with a gap in the ring occurring at low temporal  
694 frequencies. Suppression also appeared as partial rings off the preferred velocity plane, much like  
695 the opponent suppression reported in Rust et al. (2006). Inagaki et al. (2016) performed linear  
696 regression directly on the frequencies of their stimulus, which was comprised of multiple gratings  
697 superimposed spatially and partially overlapping in time. They observed broadly tuned receptive  
698 fields at mid- and high temporal frequencies in two pattern cells and observed diffuse suppression  
699 off the preferred velocity plane. The absence of excitation at low temporal frequencies observed in  
700 both studies provides indirect support for our use of suppression there.

701 Neither Nishimoto and Gallant (2011) nor Inagaki et al. (2016) directly confirmed that their  
702 models could produce pattern tuning, making the connection between the receptive field structure  
703 they observed and pattern selectivity harder to interpret. The velocity separable model is able  
704 to reproduce pattern tuning in both frequency- and velocity-separable coordinates, while making  
705 slightly different predictions of receptive field structure. Pattern cells have excitation on a full ring  
706 on the preferred velocity plane, with partially overlapping suppression at low temporal frequencies  
707 (figure 11(f)). Including normalization at the V1 stage (Rust et al., 2006; Nishimoto and Gallant,  
708 2011) or using a purely subtractive form of suppression in MT (as in all three aforementioned



709 studies) in the separable models was not sufficient to simultaneously account for the broad tuning  
710 observed for constant velocity plaids.

## 711 **Conclusions drawn from the separable model**

712 Selectivity to moving patterns is a hallmark of MT response. How does this selectivity arise?  
713 Orientation selectivity in V1 provides a useful analogy. There, first-order properties of selectivity  
714 to simple stimuli, such as simple/complex classification, can be attributed to linearly weighting of  
715 LGN afferents (Reid and Alonso, 1995; Goris et al., 2015). Responses to compound stimuli, however,  
716 are likely a result of additional (possibly recurrent) computation within V1. Likewise, basic MT  
717 direction selectivity along the component/pattern continuum is can be constructed by appropriate  
718 summing of V1 inputs (on a constant velocity plane) and shaped on a per-neuron basis by their  
719 own point-wise nonlinearities. Further nonlinear tuning behaviors, such as the different tuning  
720 bandwidths for constant velocity gratings and plaids, is likely shaped by recurrent computation  
721 within MT.

722 There is some evidence of recurrent computation shaping pattern motion signals in MT. Using  
723 drifting fields of bars, Pack and Born (2001) showed that pattern motion tuning emerges later in  
724 a pattern neuron's response—approximately 70ms after its earliest response to stimulus onset—  
725 a result later replicated with sinusoidal gratings and plaids (Smith et al., 2005; Solomon et al.,  
726 2011). Further experiments could be done to verify this recurrent computation prediction. If  
727 feasible, imaging a population of MT neurons and fitting a population-level model could reveal  
728 these recurrent computations, as has been done in V1 (Cossell et al., 2015; Antolík et al., 2016;  
729 Klindt et al., 2017). Examining dynamics of tuning to compound stimuli, possibly with whole-cell  
730 recording techniques, could also provide empirical evidence regarding the nature of suppression in  
731 MT.

732 While the velocity separable model unifies data and theory regarding tuning for pattern direction  
733 and velocity, there is much work to be done to further incorporate other aspects of MT selectivity  
734 into the model. The velocity separable model includes rudimentary gain control, and we used  
735 stimuli which only had two different contrast values. However, accounting for gain control in MT,  
736 and its interactions with pattern motion selectivity, motion opponency, and stimulus size (Britten  
737 and Heuer, 1999; Heuer and Britten, 2002), will likely require more experiments, and perhaps  
738 inclusion of a full normalization pool at the MT stage.

739 A strict interpretation of the Simoncelli and Heeger (1998) model predicts broad direction  
740 tuning to both constant velocity gratings and plaids, yet we only observed broad tuning to the  
741 latter (figures 6 and 8(d)). This is consistent with later findings (Priebe et al., 2003; Priebe et al.,  
742 2006) suggesting that some speed tuning in MT is inherited from V1, but that full form-independent  
743 speed computation occurs within MT, and is evident only when multiple spatial frequencies are  
744 present. Our results further suggest that individual MT pattern neurons always signal motion  
745 direction, but only signal speed when it is uniquely specified (i.e., when multiple orientations or  
746 spatial frequencies are present).

747 Finally, our findings change our understanding of the role of MT in motion perception. Consider  
748 a single drifting contour or grating, viewed through an aperture. The true direction of motion is  
749 inherently ambiguous: any drift direction  $\pm 90$  degrees from normal is a valid interpretation.  
750 Perceptually, however, this so-called “aperture problem” is unambiguously solved: the grating  
751 is perceived to be drifting in the direction normal to its orientation (Stumpf, 1911; Todorović,  
752 1996; Wohlgenuth, 1911; Wallach, 1935; Marr and Ullman, 1981; Adelson and Movshon, 1982).  
753 Previously, it was thought that pattern selective neurons in MT, as a population, would signal a  
754 single grating’s drift direction ambiguously (Movshon et al., 1985; Simoncelli and Heeger, 1998).

755 Our findings show MT pattern neurons can unambiguously signal such motion, and that such a  
756 population can represent the translational motion of a stimulus regardless of whether it contains  
757 a mixture of orientations or a single one. The representation of motion in MT may thus be even  
758 closer to perception than previously thought.

## 759 **References**

- 760 Adams DL, Economides JR, Jocson CM, Horton JC (2007) A biocompatible titanium headpost  
761 for stabilizing behaving monkeys. *Journal of Neurophysiology* 98:993–1001.
- 762 Adams DL, Economides JR, Jocson CM, Parker JM, Horton JC (2011) A watertight acrylic-free  
763 titanium recording chamber for electrophysiology in behaving monkeys. *Journal of Neurophysiol-*  
764 *ogy* 106:1581–1590.
- 765 Adelson EH, Movshon JA (1982) Phenomenal coherence of moving visual patterns. *Na-*  
766 *ture* 300:523–5.
- 767 Antolík J, Hofer SB, Bednar JA, Mrcic-Flogel TD (2016) Model Constrained by Visual Hierarchy  
768 Improves Prediction of Neural Responses to Natural Scenes. *PLoS Computational Biology* 12:1–22.
- 769 Britten KH, Heuer HW (1999) Spatial summation in the receptive fields of MT neurons. *Journal*  
770 *of Neuroscience* 19:5074–5084.
- 771 Carandini M, Heeger DJ, Movshon JA (1997) Linearity and normalization in simple cells of the  
772 macaque primary visual cortex. *Journal of Neuroscience* 17:8621–44.
- 773 Cavanaugh JR, Bair W, Movshon JA (2002) Nature and interaction of signals from the receptive  
774 field center and surround in macaque V1 neurons. *Journal of Neurophysiology* 88:2530–46.

- 775 Cossell L, Iacaruso MF, Muir DR, Houlton R, Sader EN, Ko H, Hofer SB, Mrsic-Flogel TD  
776 (2015) Functional organization of excitatory synaptic strength in primary visual cortex. *Nature*  
777 *ture* 518:399–403.
- 778 Derrington A, Lennie P (1984) Spatial and temporal contrast sensitivities of neurones in lateral  
779 geniculate nucleus of macaque. *Journal of Physiology* 357:219–40.
- 780 Dubner R, Zeki SM (1971) Response properties and receptive fields of cells in an anatomically  
781 defined region of the superior temporal sulcus in the monkey. *Brain research* 35:528–32.
- 782 Efron B, Tibshirani R (1993) *An introduction to the bootstrap* Chapman & Hall/CRC, Boca  
783 Raton, FL.
- 784 Enroth-Cugell C, Robson JG, Schweitzer-Tong DE, Watson AB (1983) Spatio-temporal inter-  
785 actions in cat retinal ganglion cells showing linear spatial summation. *The Journal of Physiol-*  
786 *ogy* 341:279–307.
- 787 Goris RLT, Movshon JA, Simoncelli EP (2014) Partitioning neuronal variability. *Nature Neuro-*  
788 *science* 17:858–65.
- 789 Goris RLT, Simoncelli EP, Movshon JA (2015) Origin and Function of Tuning Diversity in  
790 Macaque Visual Cortex. *Neuron* 88:1–13.
- 791 Hawken MJ, Shapley RM, Grosof DH (1996) Temporal-frequency selectivity in monkey visual  
792 cortex. *Visual Neuroscience* 13:477–492.
- 793 Heuer HW, Britten KH (2002) Contrast dependence of response normalization in area MT of the  
794 rhesus macaque. *Journal of Neurophysiology* 88:3398–408.

- 795 Inagaki M, Sasaki KS, Hashimoto H, Ohzawa I (2016) Subspace mapping of the three-dimensional  
796 spectral receptive field of macaque MT neurons. *Journal of Neurophysiology* p. jn.00934.2015.
- 797 Johnston JM, Cohen YE, Shirley H, Tsunada J, Benmur S, Christison-Lagay K, Veeder CL  
798 (2016) Recent refinements to cranial implants for rhesus macaques (*Macaca mulatta*). *Lab Ani-*  
799 *mal* 45:180–186.
- 800 Klindt DA, Ecker AS, Euler T, Bethge M (2017) Neural system identification for large populations  
801 separating "what" and "where". *Advances in Neural Information Processing Systems* 31:4–6.
- 802 Kumano H, Uka T (2013) Responses to Random Dot Motion Reveal Prevalence of Pattern-Motion  
803 Selectivity in Area MT. *Journal of Neuroscience* 33:15161–15170.
- 804 Marr D, Ullman S (1981) Directional selectivity and its use in early visual processing. *Proceedings*  
805 *of the Royal Society of London - Series B: Biological Sciences* 211:151–180.
- 806 Maunsell JHR, Van Essen DC (1983) Functional properties of neurons in middle temporal visual  
807 area of the macaque monkey. I. Selectivity for stimulus direction, speed, and orientation. *Journal*  
808 *of Neurophysiology* 49:1127–47.
- 809 McDonald JS, Clifford CW, Solomon SS, Chen SC, Solomon SG (2014) Integration and segre-  
810 gation of multiple motion signals by neurons in area MT of primate. *Journal of Neurophysiol-*  
811 *ogy* 111:369–378.
- 812 Movshon JA, Adelson EH, Gizzi MS, Newsome WT (1985) The analysis of moving visual pat-  
813 terns In Chagas C, Gattass R, Gross CG, editors, *Pattern Recognition Mechanisms (Pontificiae*  
814 *Academiae Scientiarum Scripta Varia)*, Vol. 54, pp. 117–151, Rome. Vatican Press.

- 815 Nishimoto S, Gallant JL (2011) A three-dimensional spatiotemporal receptive field model explains  
816 responses of area MT neurons to naturalistic movies. *Journal of Neuroscience* 31:14551–64.
- 817 Pack CC, Born RT (2001) Temporal dynamics of a neural solution to the aperture problem in  
818 visual area MT of macaque brain. *Nature* 409:1040–2.
- 819 Perrone JA, Thiele A (2001) Speed skills: measuring the visual speed analyzing properties of  
820 primate MT neurons. *Nature Neuroscience* 4:526–532.
- 821 Perrone JA (2004) A visual motion sensor based on the properties of V1 and MT neurons. *Vision*  
822 *Research* 44:1733–1755.
- 823 Perrone JA, Thiele A (2002) A model of speed tuning in MT neurons. *Vision Re-*  
824 *search* 42:1035–1051.
- 825 Priebe NJ, Cassanello CR, Lisberger SG (2003) The neural representation of speed in macaque  
826 area MT/V5. *Journal of Neuroscience* 23:5650–61.
- 827 Priebe NJ, Lisberger SG, Movshon JA (2006) Tuning for spatiotemporal frequency and speed in  
828 directionally selective neurons of macaque striate cortex. *Journal of Neuroscience* 26:2941–50.
- 829 Reid R, Alonso J (1995) Specificity of monosynaptic connections from thalamus to visual cortex.  
830 *Nature* 378:281–283.
- 831 Rodman HR, Albright TD (1987) Coding of visual stimulus velocity in area MT of the macaque.  
832 *Vision Research* 27:2035–2048.
- 833 Rust NC, Mante V, Simoncelli EP, Movshon JA (2006) How MT cells analyze the motion of visual  
834 patterns. *Nature Neuroscience* 9:1421–31.

- 835 Schrater PR, Knill DC, Simoncelli EP (2000) Mechanisms of visual motion detection. *Nature*  
836 *Neuroscience* 3:64–8.
- 837 Sclar G, Maunsell JHR, Lennie P (1990) Coding of image contrast in central visual pathways of  
838 the macaque monkey. *Vision research* 30:1–10.
- 839 Simoncelli EP, Heeger D (1998) A model of neuronal responses in visual area MT. *Vision*  
840 *Research* 38:743–761.
- 841 Smith MA, Majaaj NJ, Movshon JA (2005) Dynamics of motion signaling by neurons in macaque  
842 area MT. *Nature Neuroscience* 8:220–8.
- 843 Solomon SS, Tailby C, Gharaei S, Camp AJ, Bourne JA, Solomon SG (2011) Visual motion  
844 integration by neurons in the middle temporal area of a New World monkey, the marmoset. *The*  
845 *Journal of Physiology* 589:5741–5758.
- 846 Stumpf P (1911) Über die Abhängigkeit der visuellen Bewegungsrichtung und negativen Nach-  
847 bildes von den Reizvorgängen auf der Netzhaut. *Zeitschrift für Psychologie* 59:321–330.
- 848 Todorović D (1996) A gem from the past: Pleikart Stumpf's (1911) anticipation of the  
849 aperture problem, Reichardt detectors, and perceived motion loss at equiluminance. *Percep-*  
850 *tion* 25:1235–1242.
- 851 Tolhurst DJ, Movshon JA (1975) Spatial and temporal contrast sensitivity of striate cortical  
852 neurones. *Nature* 257:674–675.
- 853 Van Essen D, Maunsell J, Bixby J (1981) The middle temporal visual area in the macaque:  
854 myeloarchitecture, connections, functional properties and topographic organization. *Journal of*  
855 *Comparative Neurology* 199:293–326.

- 856 Wallach H (1935) Ueber visuell wahrgenommene bewegungsrichtung. *Psychologische*  
857 *Forschung* 20:325–380.
- 858 Wang HX, Movshon JA (2016) Properties of pattern and component direction-selective cells in  
859 area MT of the macaque. *Journal of Neurophysiology* 115:2705–2720.
- 860 Watson AB, Ahumada AJ (1983) A look at motion in the frequency domain In *Motion: Repre-*  
861 *sentation and Perception*, pp. 1–10. ACM, Baltimore.
- 862 Watson AB, Ahumada AJ (1985) Model of human visual-motion sensing. *Journal of the Optical*  
863 *Society of America A* 2:322–342.
- 864 Wohlgenuth A (1911) On the after-effect of seen movement. *British Journal of Psychology,*  
865 *Monograph Supplement 1* pp. 1–117.
- 866 Xiao J, Huang X (2015) Distributed and Dynamic Neural Encoding of Multiple Motion Directions  
867 of Transparently Moving Stimuli in Cortical Area MT. *Journal of Neuroscience* 35:16180–16198.



## 868 **Figure Captions**

869 **Figure 1. Pattern index, frequency-separable and velocity-separable hypotheses, and**  
870 **their predicted tuning.** (a) Tuning curve of an idealized direction-selective neuron, responding  
871 to drifting gratings. (b) An ideal pattern-selective neuron exhibits a unimodal tuning curve for  
872 drifting plaids (red), while an ideal component neuron shows a bimodal tuning curve (blue). The  
873 peaks of the component neuron tuning curve correspond to the directions of the two gratings that  
874 comprise the plaid. (c) The “pattern index” captures the degree to which a given neuron is pattern  
875 or component selective. Each point represents the correlation of a given neuron’s measured tuning  
876 curve with the ideal component and pattern tuning (abscissa and ordinate, respectively; see meth-  
877 ods for details), as predicted from its actual grating responses. Open and filled points correspond  
878 to neurons featured in this paper in V1 ( $n = 21$ ) and MT ( $n = 112$ ), respectively.

879 (d) Three-dimensional frequency domain representation of moving images, with two spatial fre-  
880 quency axes and one temporal frequency axis. These coordinates can alternatively be expressed  
881 as orientation, spatial frequency, and temporal frequency. A single point in the frequency domain  
882 represents a single drifting sinusoidal grating. (e) The motion of a rigidly translating pattern (e.g.,  
883 a field of dots moving with the same velocity) contains frequency components that lie on a plane  
884 through the origin. (f-g) Two possible hypotheses for MT selectivity in the frequency domain. In a  
885 velocity-separable receptive field (f), spatial and temporal frequency tuning are concentrated along  
886 a tilted, preferred velocity plane. In the frequency-separable prediction (g), spatial and temporal  
887 frequency tuning are independent. Note the velocity-separable hypothesis depicted “shears” along  
888 the vertical (temporal frequency) direction, rather than the direction orthogonal to the preferred  
889 velocity plane. See Methods for details.

890 (h-i) Contour plots of slices through the two selectivity volumes from (f) and (g) at the optimal  
891 direction, superimposed with stimuli for two “classical” tuning experiments (black lines) containing  
892 the optimal stimulus (black ball) and suboptimal stimuli (dark gray): (h) spatial frequency tuning  
893 at optimal and low temporal frequencies, and (i) temporal frequency tuning at optimal and low  
894 spatial frequencies. (j-k) Temporal and spatial frequency tuning for the two models is the same for  
895 “classical” stimuli (red-blue dashed lines), but different for non-optimal stimuli (red and blue solid  
896 lines). The velocity-separable (light red) spatial and temporal frequency tuning curves are shifted  
897 away from the tuning curves observed for optimal stimuli.

898 **Figure 2. At the preferred direction, V1 is frequency-separable and MT is velocity-**  
899 **separable.** (a) Spatial frequency tuning curve data from an example MT cell, measured at three  
900 temporal frequencies (error bars denote  $\pm 1$  s.d.). The light gray shaded area denotes the sponta-  
901 neous firing rate,  $\pm 1$  s.d. The fitted SF tuning preferences for the three curves are shown above as  
902 triangles. (b) The fitted SF preferences from each cell are plotted against the TFs at which they  
903 were presented. Both axes are on a normalized scale, representing the ratio of the non-optimal  
904 frequencies, relative to the optimal frequency. Each line is the best fit line to the data for one  
905 cell. The data along the ordinate axis are aligned to the offset of each best fit line. Lines and  
906 points are shaded by the pattern index corresponding to each individual cell. Red corresponds to  
907 MT neurons, with darker shades corresponding to higher pattern index, and blue corresponds to  
908 V1 neurons, with darker shades corresponding to lower pattern index. The blue and red triangles  
909 indicate the mean slopes for all V1 and MT neurons, respectively. Error bars indicate the 95%  
910 confidence intervals of 1000 bootstrapped fitted peak stimulus values (see Methods for details). (c)  
911 Same as (b), but based on TF tuning curves measured at optimal and suboptimal SFs. (d) Same  
912 as (c), but based on TF tuning curves at optimal and suboptimal directions. Here the points are

913 aligned to the origin, which represents the preferred TF at the preferred direction. Mean slopes in  
914 (d) are computed separately for the different suboptimal directions.

915 **Figure 3. The separable models.** A stimulus is passed through a narrowly tuned V1 linear  
916 weighting, then squared and normalized. V1 output is then passed to the MT neuron, which  
917 applies either a frequency- or velocity-separable linear weighting, then raises the output to a super-  
918 linear power, and undergoes another stage of normalization. Finally, a modulated Poisson process  
919 determines spike variability.

920 **Figure 4. Comparison of actual and model-predicted responses to single gratings for**  
921 **four example MT neurons.** (a,b) Two example component neurons, one better fit by the  
922 frequency-separable model (a) and one better fit by the velocity-separable model (b). (c,d) Two  
923 example pattern neurons, one better fit by the frequency model (c) and one better fit by the velocity  
924 model (d). Measured spike rate mean and standard deviation are shown in black. Velocity model  
925 predicted spike rates are shown in red, frequency model predictions in blue. All subsequent figures  
926 follow this color convention. Means are indicated by the dark lines,  $\pm 1$  standard deviation by the  
927 lighter shaded areas. In the scatter plots on the right, each point represents how well the frequency  
928 and velocity models predict the mean firing rate for one spatiotemporal frequency among the 225  
929 presented across all experiments. Goodness of fit is expressed in terms of log likelihood under the  
930 modulated Poisson process, where values closer to zero indicate a better fit. The log likelihoods are  
931 normalized to a scale between 0 and 1, which represent the null and oracle model prediction log  
932 likelihoods, respectively (see Methods for details). Each point is colored on a Fisher transformed  
933 scale (i.e., in units of standard deviation). The difference between the velocity and model predictions  
934 for each neuron are summarized as a single value ( $\Delta NLL = NLL_V - NLL_F$ ). Renderings of the

935 frequency and velocity model linear weightings for each example neuron (rightmost column). All  
936 four neurons were recorded under anesthesia.

937

938 **Figure 5. Single grating stimuli do not distinguish the two models.** Fit quality, expressed  
939 as the normalized log likelihood of the velocity and frequency models, is plotted for each neuron  
940 on Fisher transformed axes. V1 neurons ( $n = 13$ ) are shown with open circles, MT ( $n = 39$ )  
941 with closed circles. Blue, black, and red colors indicate whether a neuron is classed as component,  
942 intermediate, or pattern selective, respectively. Error bars denote standard error of the mean. On  
943 average, the two models are equally good at explaining the single grating MT data for any class of  
944 cells. The frequency model explains the V1 single grating data better.

945 **Figure 6. Velocity grating direction tuning tends to be slightly wider.** (a) Direction  
946 bandwidth (in degrees) for each neuron was calculated separately for constant- frequency and  
947 velocity grating tuning curves. is plotted for each neuron. Blue indicates a component neuron, black  
948 intermediate, and red a pattern neuron. V1 neurons ( $n = 21$ ) are shown with open circles, MT ( $n =$   
949 112) with closed circles. This figure includes isomorphic data recorded from the next experiment,  
950 described in the next section. (b) Differences of velocity and frequency grating bandwidth, by  
951 pattern classification. Proportions are expressed within each classification type, but including both  
952 V1 and MT neurons (open and filled stacked bars, respectively). Pattern and intermediate neurons  
953 have wider velocity grating direction bandwidth, significant below  $p < 0.0005$  (Wilcoxon signed  
954 rank test).

955 **Figure 7. Two-component “planar plaid” experiment design and predictions.** Constant-

956 velocity and constant-frequency direction tuning experiments were done with gratings and plaids.  
957 Constant-velocity plaids (a) were constructed by superimposing two gratings  $120^\circ$  apart and drifting  
958 at a temporal frequency determined by the optimal velocity plane. Constant-frequency plaids (b)  
959 were two gratings  $120^\circ$  apart superimposed and drifting at the optimal temporal frequency. The  
960 example plaids shown contain the same orientations, but have different component drift rates, and  
961 thus different perceived drift directions. (c) For the two models matched in constant-frequency  
962 plaid direction tuning (red and blue dashed line), the velocity model (red) predicts a high response  
963 rate to all constant-velocity plaids. The frequency model (blue) is more narrowly tuned.

964 **Figure 8. Comparison of actual and model-predicted responses to gratings and plaids**  
965 **for four example neurons.** First five columns show data (points) and tuning curves predicted by  
966 the frequency- (blue) and velocity-separable (red) models. The first four columns are responses to  
967 gratings and plaids with constant frequency and velocity. The fifth column is temporal frequency  
968 data collected in a separate session, but included in the model fits. (a) a V1 component-selective  
969 neuron, (b) an MT component neuron, (c) an MT intermediate neuron, and (d) an MT pattern-  
970 selective neuron. The fifth column shows goodness-of-fit across all stimulus conditions, next to  
971 renderings of the fitted models. See figure 4 caption for details. Differences between the two  
972 model predictions become more apparent with increasing pattern selectivity. Neurons (a-c) are  
973 from recordings done under anesthesia, (d) is from an awake recording.

974 **Figure 9. Compound stimuli reveal velocity-separable organization for pattern cells.**  
975 (a,b) Velocity superiority, or the difference of normalized log likelihoods between the velocity and  
976 frequency models, per cell as a function of pattern index. V1 cells appear as open circles, MT  
977 closed. Example cells featured in figures 4 and 8 are highlighted in gray. Light and dark lines

978 indicate the running mean, with a window of  $\pm 1/3$  of cells in each population. Error bars indicate  
979  $\pm 1$  standard deviation, calculated from model fits to bootstrapped data (note most are smaller than  
980 the plotted points). (a) On average, for the single grating dataset, neither model better explains  
981 the single grating MT data (a) for any class of cells ( $n = 39$ ). The frequency model explains the V1  
982 single grating data better ( $n = 13$ ). (b) Pattern cell responses to the compound stimulus dataset  
983 (V1:  $n = 21$ , MT:  $n = 112$ ) are clearly better explained by the velocity model. Error bars indicate  
984  $\pm 1$  standard error. (c,d) Observed and predicted pattern indices for each cell, derived from the  
985 compound stimulus dataset, for the velocity model (c) and frequency model (d). The velocity model  
986 can account for pattern index across all cell types, whereas the frequency model fails to predict the  
987 pattern selectivity of neurons classified as pattern-selective based on measured responses. Error  
988 bars indicate 95th percentiles, generated from pattern indices calculated by bootstrapping measured  
989 and predicted spike trains.

990 **Figure 10. Relationship between velocity-separable model parameters and pattern in-**  
991 **dex.** Pattern index is strongly correlated with direction tuning bandwidth (a) and the log of the  
992 MT nonlinearity's exponent (b). (c) Pattern index is negatively correlated with the log-2 of the  
993 semi-saturation, or “uniform” divisive normalization parameter. This means that for neurons with  
994 higher pattern index, the temporal-frequency dependent suppression is stronger.

995 **Figure 11. Effects of removing model elements for one example neuron and the popu-**  
996 **lation.** (a-c) Plots and renderings are from fits to the same neuron shown in figure 8(d). In (a,  
997 b, and d), three nested model fits are shown. Lighter shades denote fits with nonlinear elements  
998 removed from the full model. LN-N is the full model, which includes linear weighting (L), a point-  
999 wise power function nonlinearity (N), and “temporal frequency dependent” normalization (-N). LN

1000 has no normalization at all, and L has no nonlinearity at the MT stage. Direction tuning data  
1001 are shown as black points and lines for constant-frequency plaids (a) and constant-velocity plaids  
1002 (b). The red and blue shaded curves show the different model fits to those data, with red and  
1003 blue corresponding to the velocity and frequency models. The darkest traces are for the full model,  
1004 the lighter ones for the model with normalization removed, and the lightest for the model with no  
1005 MT nonlinearity. Each (nested) model was optimized separately. (c) The leftmost plots show the  
1006 strength of normalization as a function of temporal frequency, for the velocity (red, top row) and  
1007 frequency (blue, second row from top) models. The middle two renderings show the linear weights  
1008 (at one level set) as a function of spatial and temporal frequency, at two different viewing angles.  
1009 The temporal frequency scale in these renderings match that of the normalization plots on the left.  
1010 The renderings on the right are a “birds-eye” view, showing the same weights as function of the  
1011 two spatial frequency dimensions. (d) Fit quality, expressed as the normalized log likelihood of the  
1012 velocity and frequency models, is plotted for all component, intermediate, and pattern neurons (in  
1013 blue, black, and red, respectively), for the three nested models (lighter shades indicate nonlinear  
1014 model elements removed, see above).





1015 **Figures**

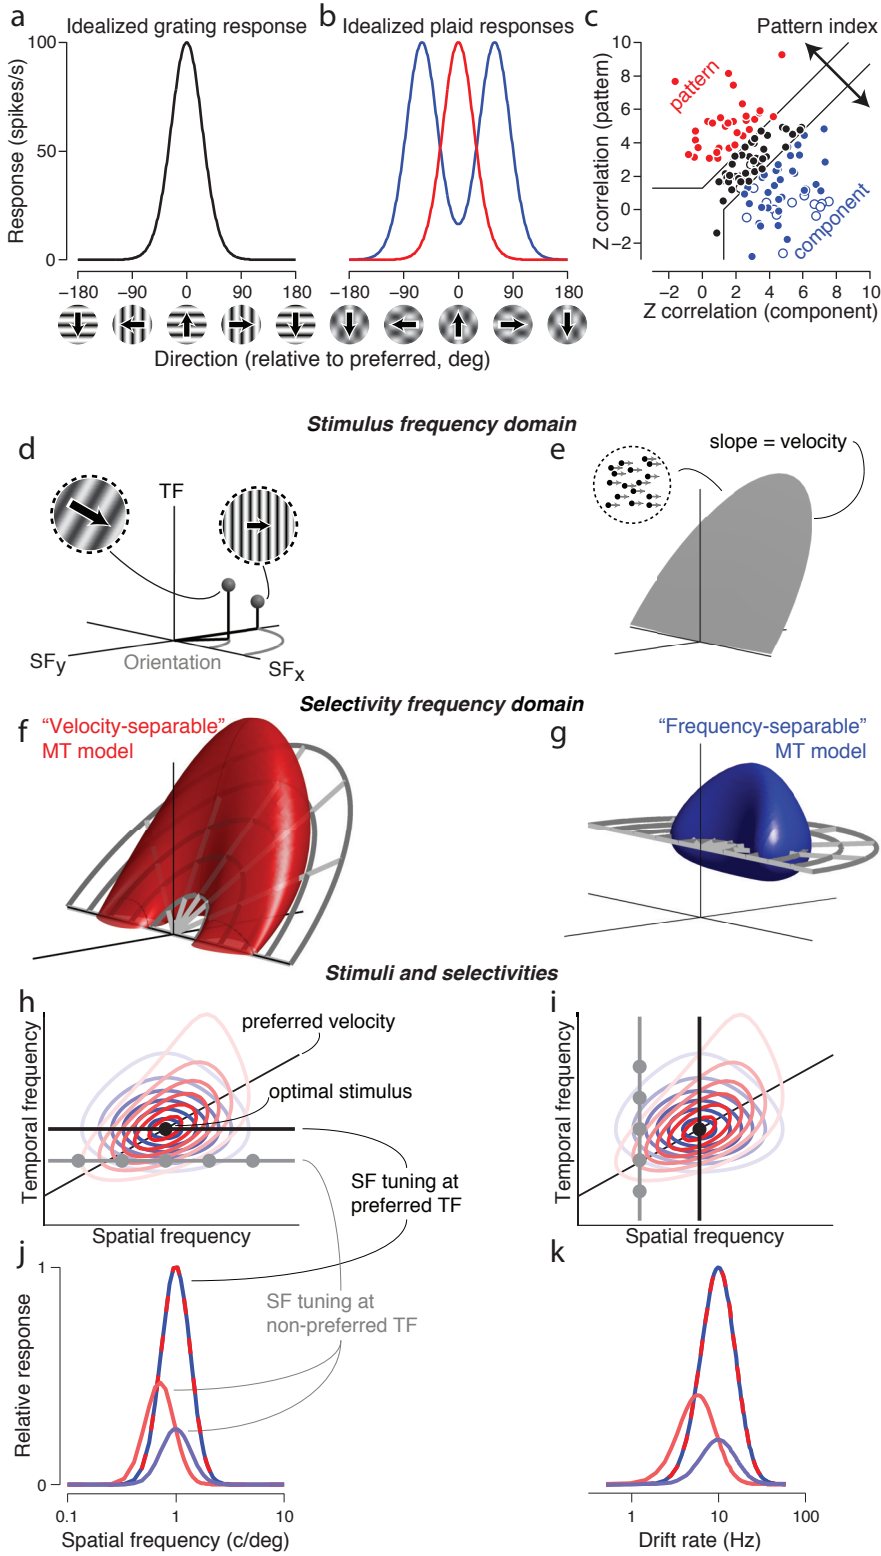

**Figure 1**

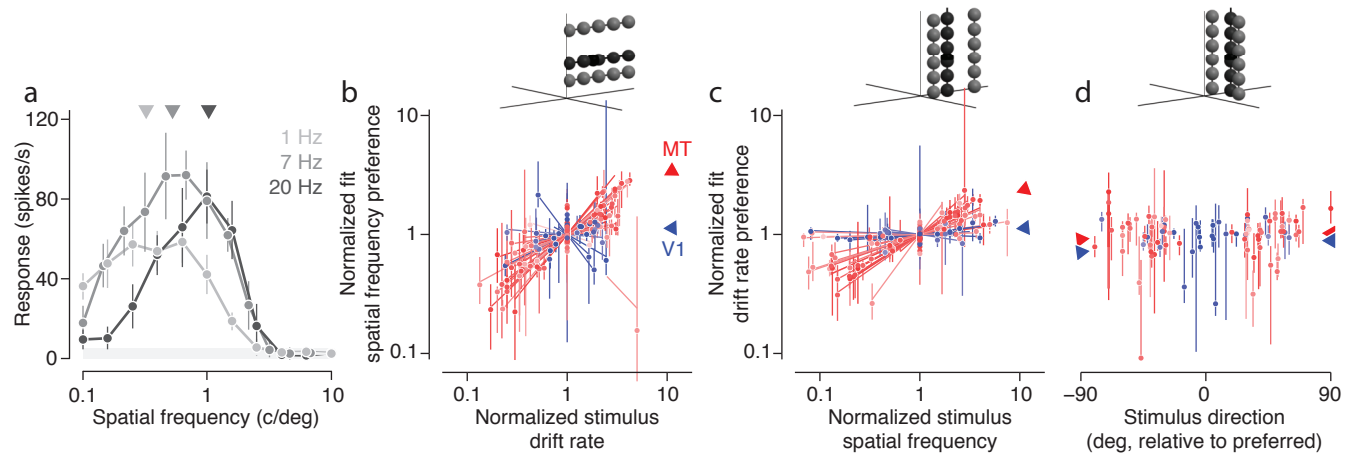

Figure 2

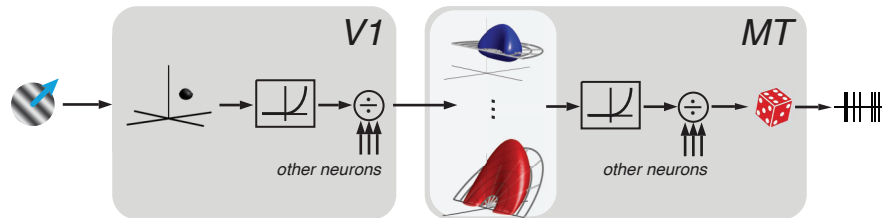

Figure 3

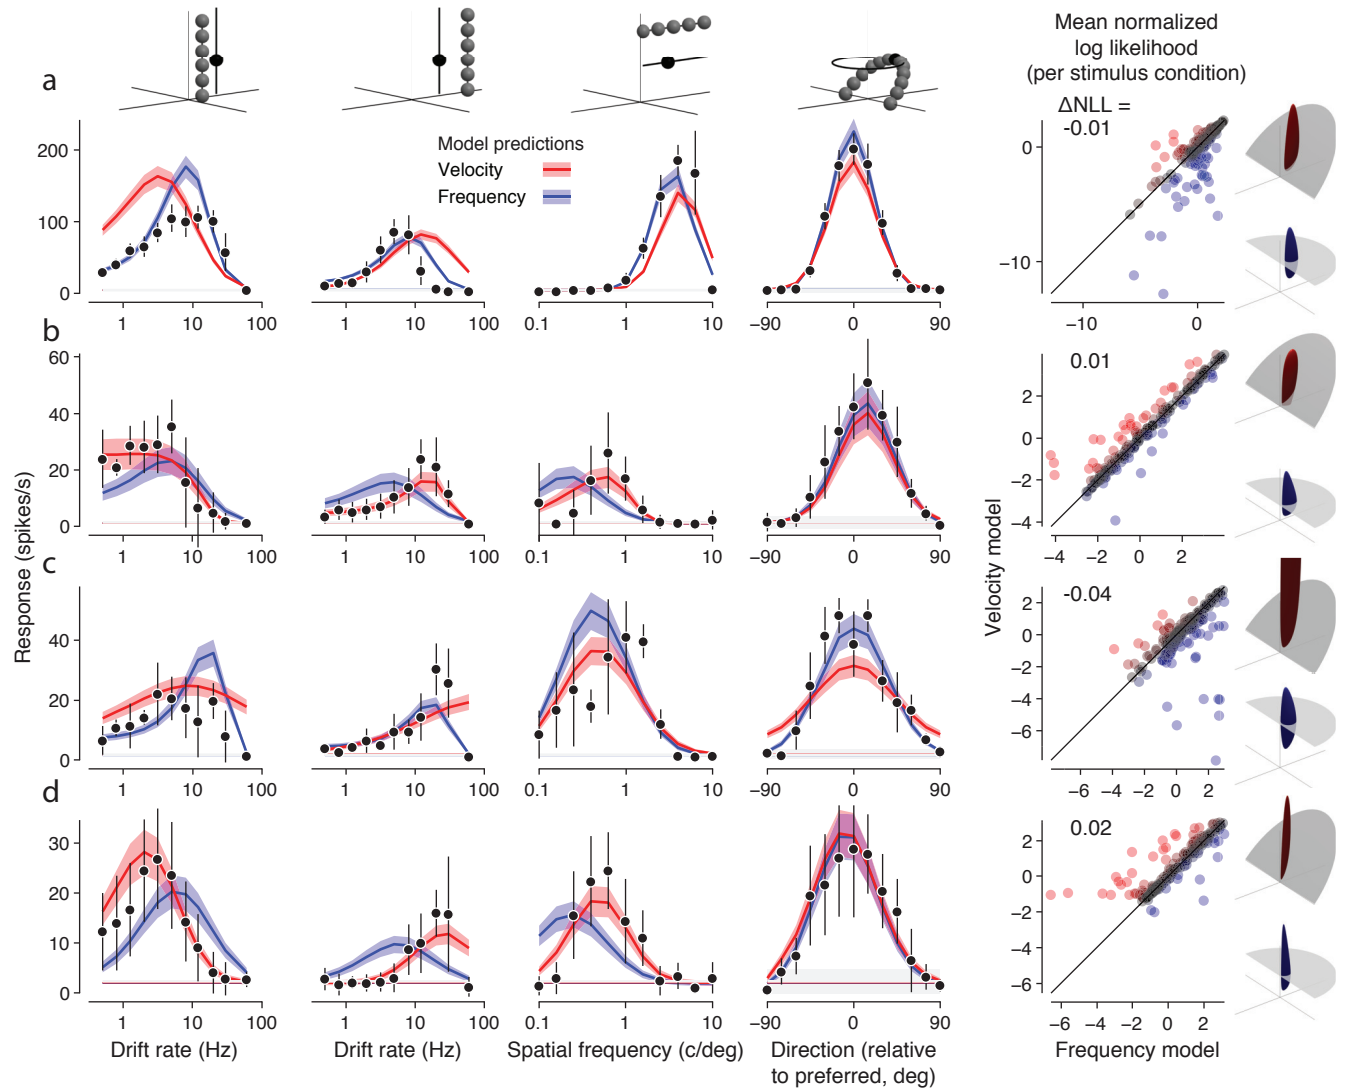

**Figure 4**

**Extended data figure 4-1.**

Single grating stimulus set, organized by tuning curves measured relative to preferred values.

**Extended data figure 4-2.**

All data and model predictions from the single grating study for the neuron in figure 4(d).

**Extended data table 4-1.**

Single grating stimulus set.

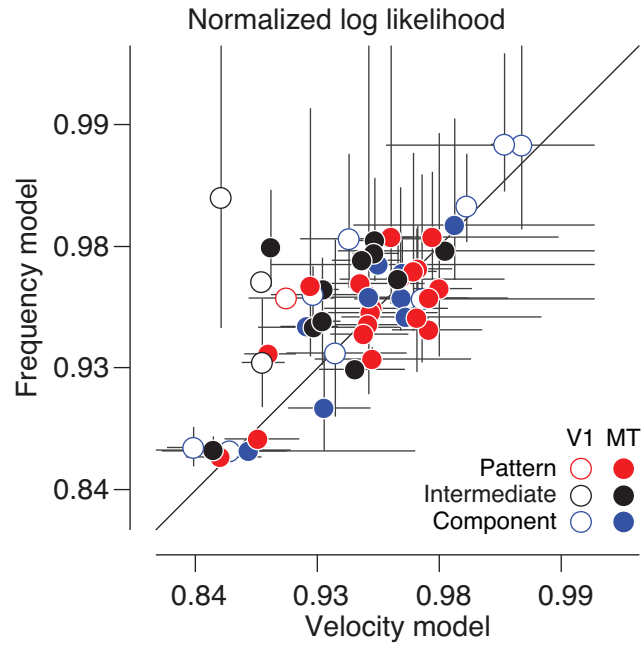

Figure 5

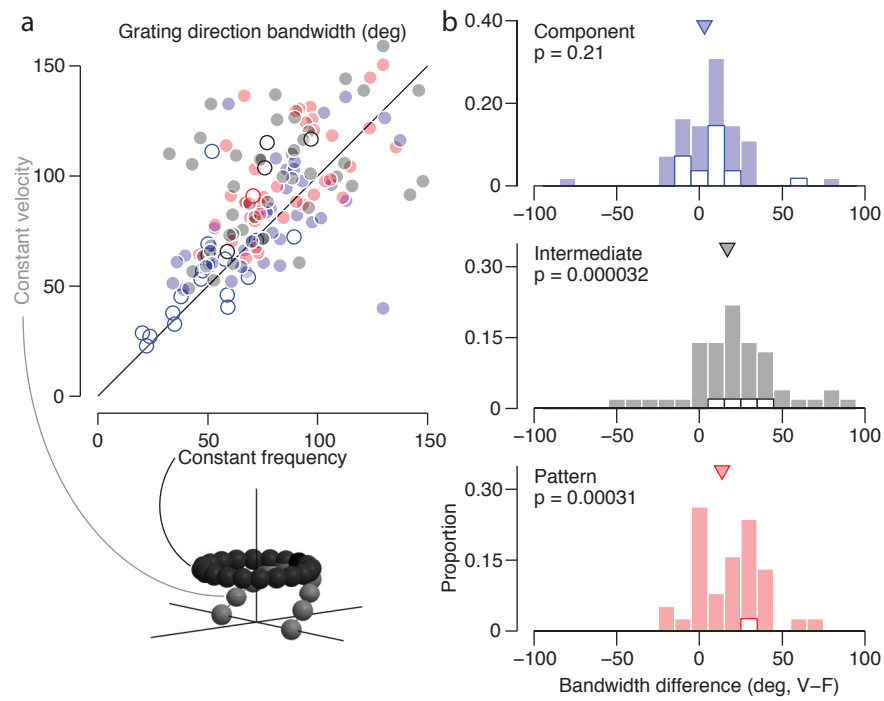

Figure 6

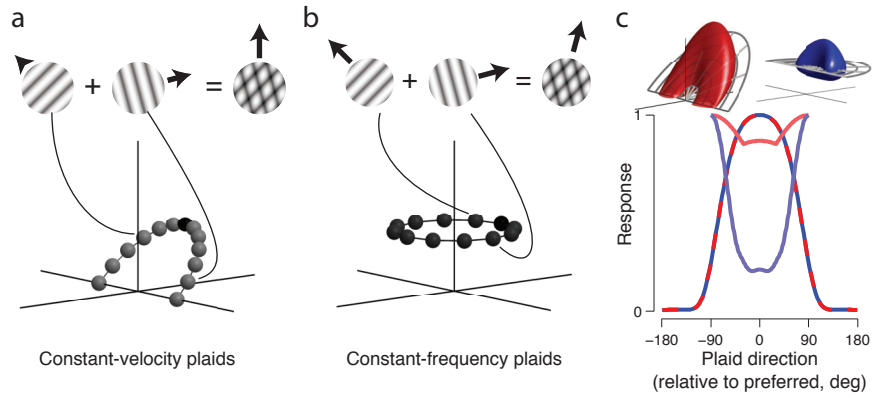

**Figure 7**

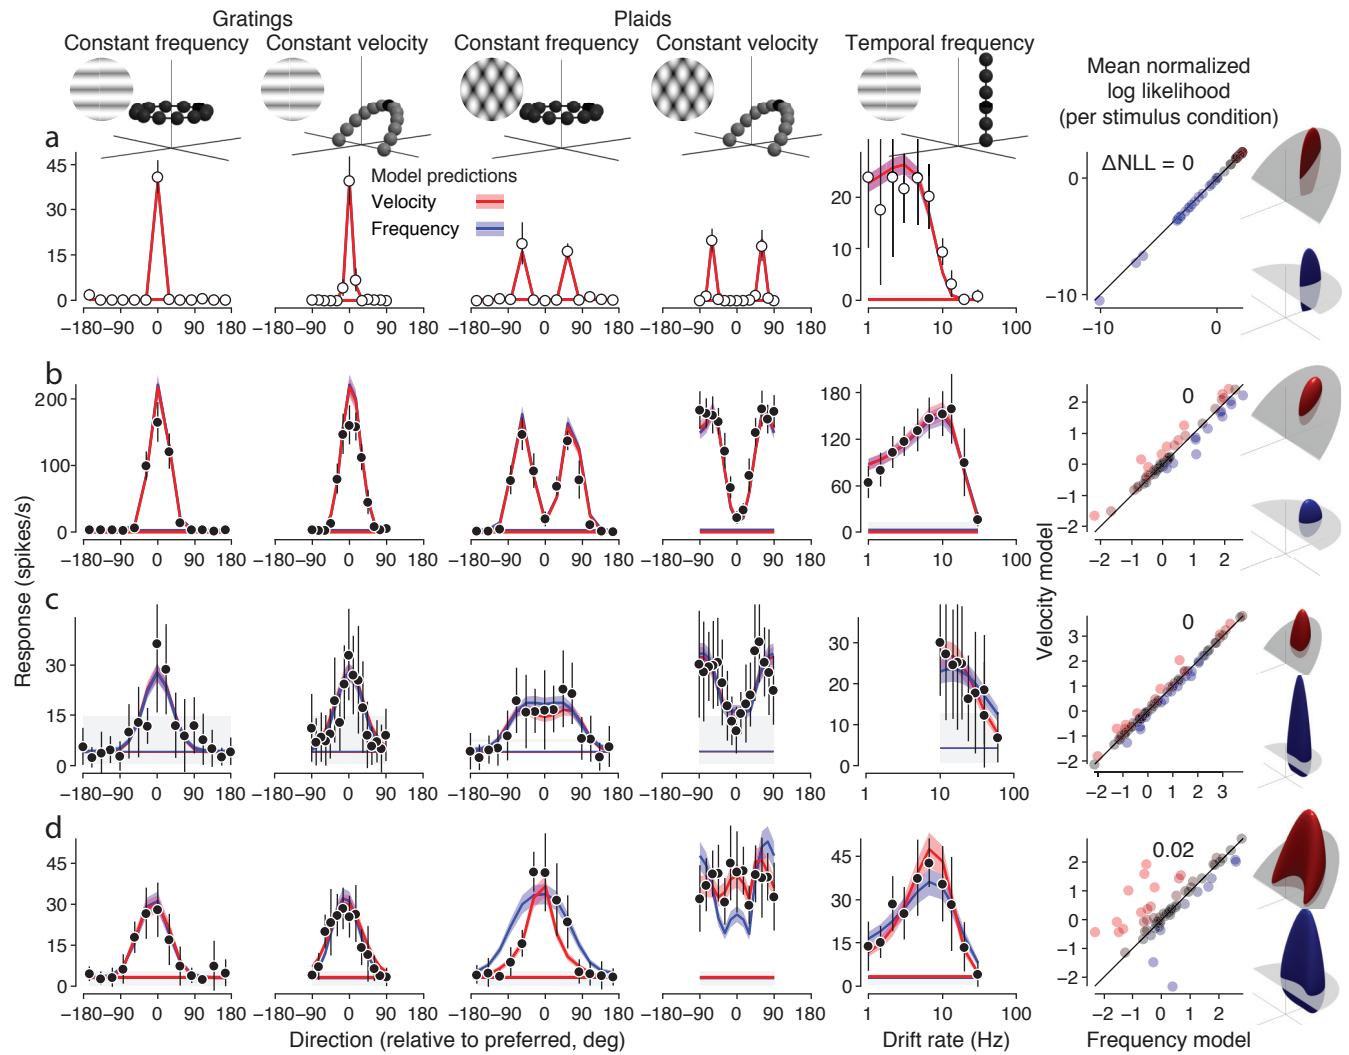

Figure 8

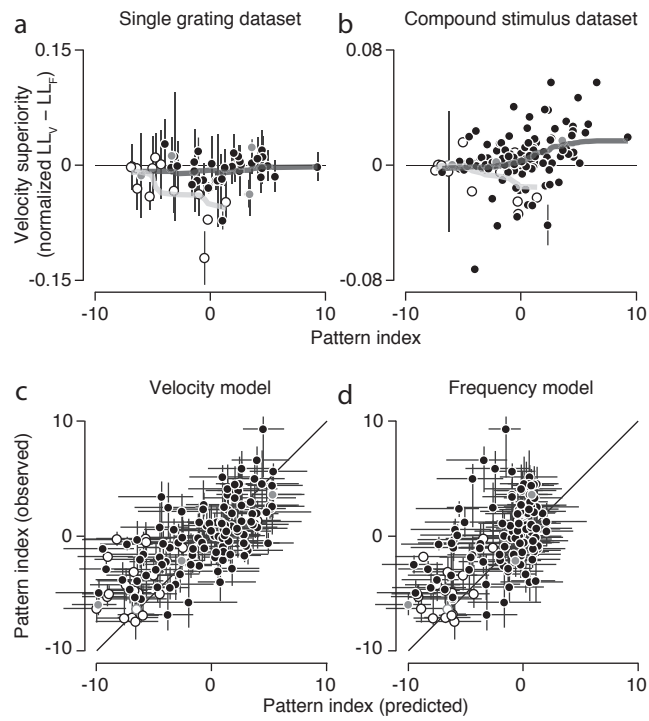

**Figure 9**

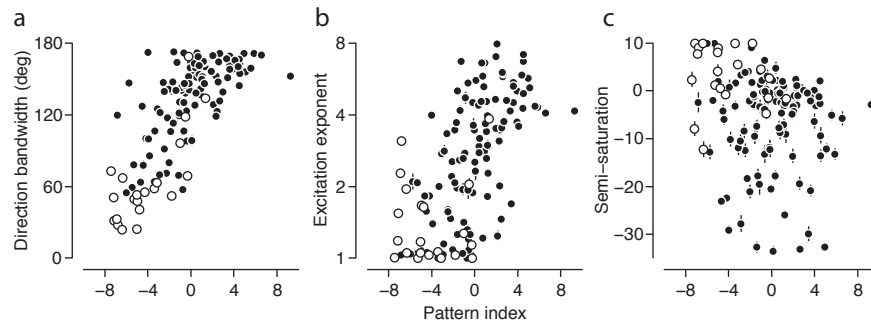

**Figure 10**

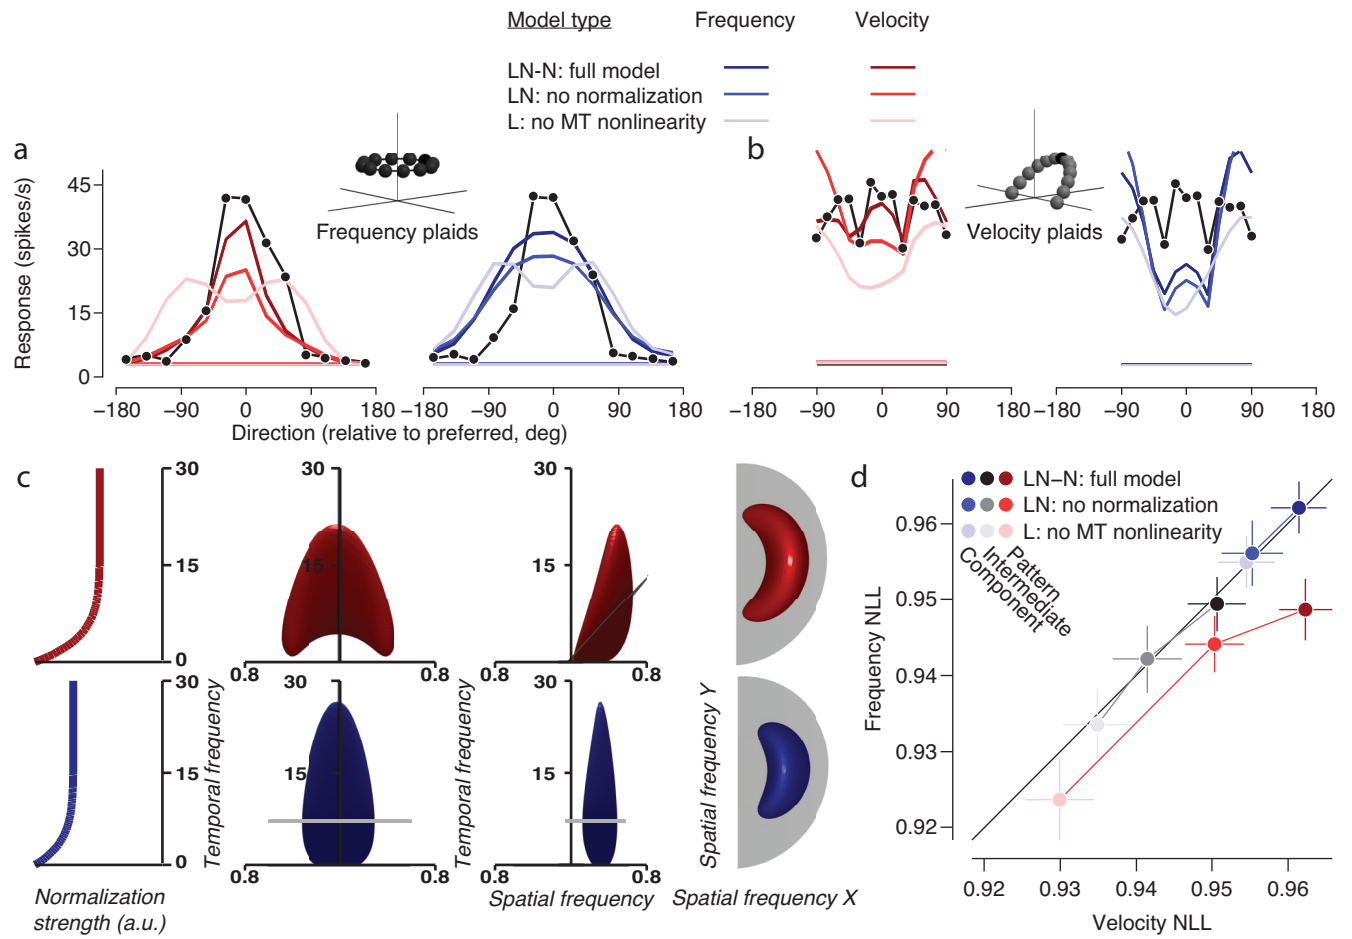

Figure 11



1016 **Extended Data**

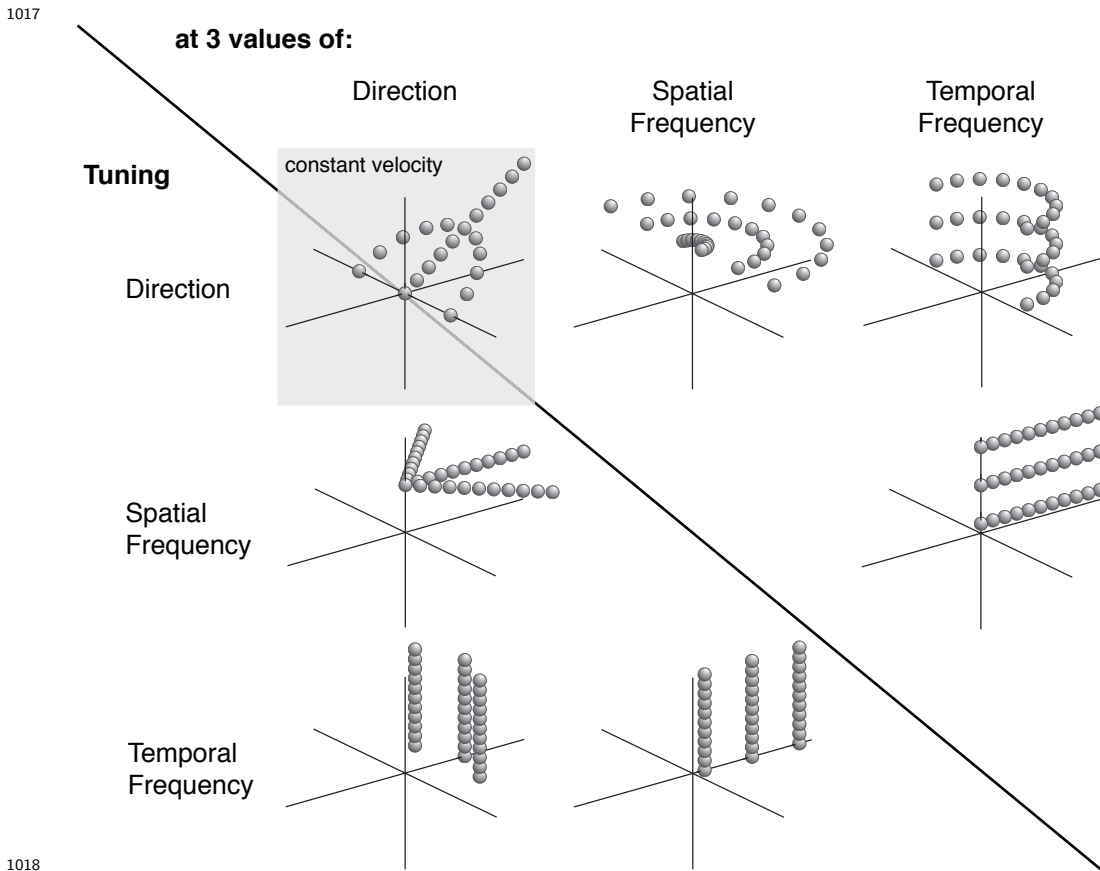

1018

1019 **Extended data figure 4-1. Single grating stimulus set, organized by tuning curves**  
1020 **measured relative to preferred values.**

1021 Top left tuning curves are constant-velocity direction tuning (arc), and constant-velocity spatiotem-  
1022 poral frequency tuning (line). All other tuning curves follow the convention that the type of tuning  
1023 curve comes from the label on the left, and they are presented at one optimal and two suboptimal  
1024 values in the dimension derived from the top label. For example, the bottom left tuning curves  
1025 are temporal frequency tuning curves measured a one optimal direction and two suboptimal ones.  
1026 Note that optimal tuning curves appear more than once in this figure, but were presented with  
1027 equal probability during the experiment.

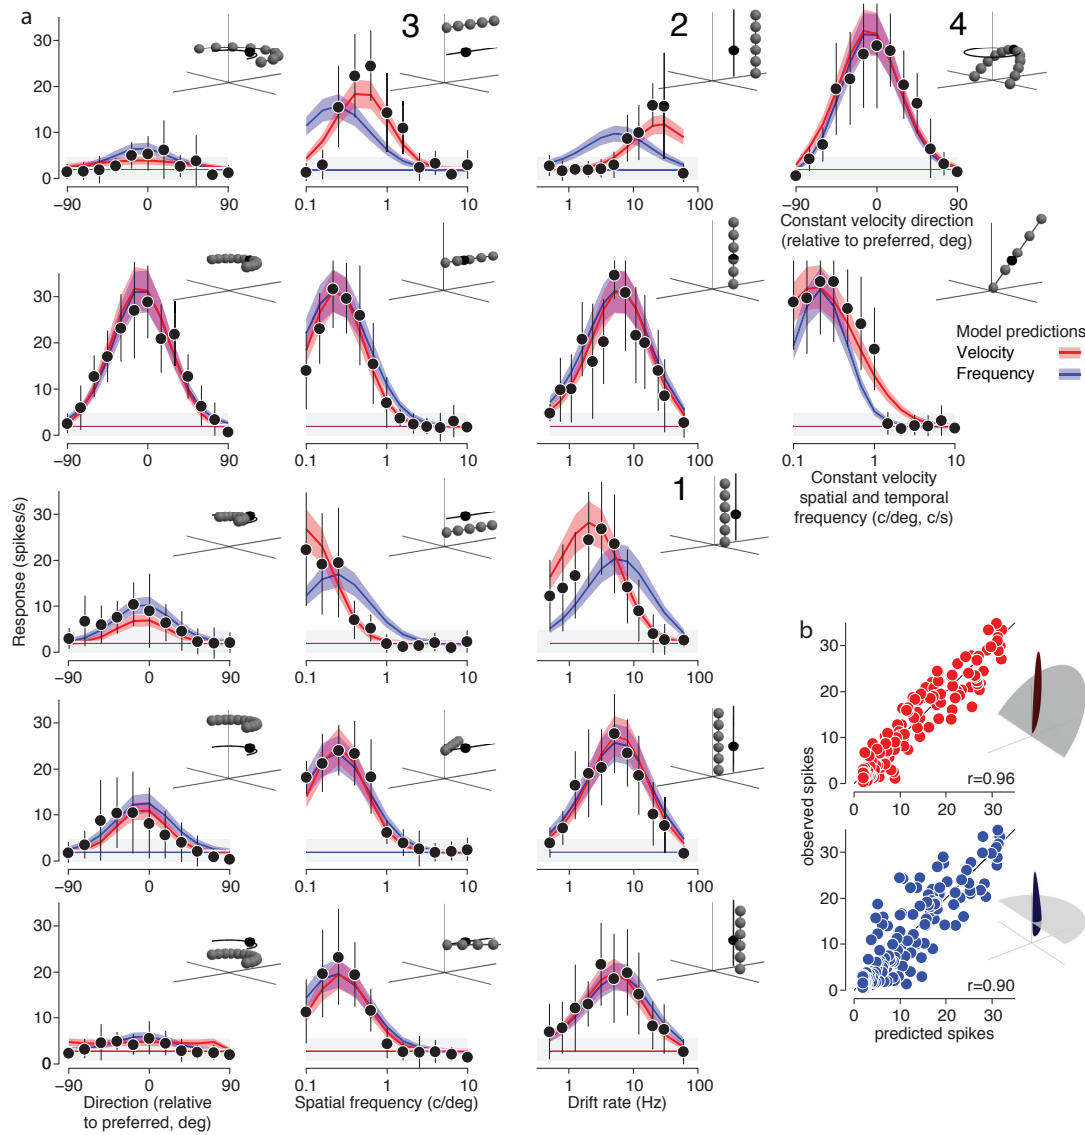

1028

1029 **Extended data figure 4-2. All data and model predictions from the single grating**  
 1030 **study for the neuron in figure 4(d).**

1031 (a) All 17 tuning curves in the single grating tuning dataset (see extended data table 4-1 and figure  
 1032 4-1). Tuning curves marked 1-4 are replicas of the bottom row of tuning curves in figure 4—see  
 1033 its caption for more details. Direction preferences (first column) do not change at different spatial  
 1034 and temporal frequencies, but gain does. Spatial frequency preferences shift at different temporal  
 1035 frequencies (second column, top three rows), but not different directions (second column, bottom

1036 three rows). The same is true for temporal frequency preferences (third column). (b) Observed  
 1037 and predicted spikes in response to each of the 225 unique data points in the single grating dataset,  
 1038 for the velocity- and frequency-separable models (red and blue, respectively).

|    | number<br>of<br>stimuli | Directions<br>(deg from<br>preferred) | SFs (c/deg) | TFs (Hz)       | Tuning type                   |
|----|-------------------------|---------------------------------------|-------------|----------------|-------------------------------|
| 1  | 13                      | -90 to 90                             | Preferred   | Preferred      | frequency-separable direction |
| 2  | 13                      | -90 to 90                             | Preferred   | 0 to Preferred | velocity-separable direction  |
| 3  | 13                      | Preferred                             | 0.1 to 10   | Preferred      | SF                            |
| 4  | 13                      | Preferred                             | 0.1 to 10   | 1 to 60        | Speed                         |
| 5  | 13                      | Preferred                             | Preferred   | 1 to 60        | TF                            |
| 6  | 11                      | -90 to 90                             | Low         | Preferred      | Low SF direction              |
| 7  | 11                      | -90 to 90                             | High        | Preferred      | High SF direction             |
| 8  | 11                      | -90 to 90                             | Preferred   | Low            | Low TF direction              |
| 9  | 11                      | -90 to 90                             | Preferred   | High           | High TF direction             |
| 10 | 11                      | Low                                   | 0.1 to 10   | Preferred      | Low direction SF              |
| 11 | 11                      | High                                  | 0.1 to 10   | Preferred      | High direction SF             |
| 12 | 11                      | Preferred                             | 0.1 to 10   | Low            | Low TF SF                     |
| 13 | 11                      | Preferred                             | 0.1 to 10   | High           | High TF SF                    |
| 14 | 11                      | Low                                   | Preferred   | 1 to 60        | Low direction TF              |
| 15 | 11                      | High                                  | Preferred   | 1 to 60        | High direction TF             |
| 16 | 11                      | Preferred                             | Low         | 1 to 60        | Low SF TF                     |
| 17 | 11                      | Preferred                             | High        | 1 to 60        | High SF TF                    |

1039

1040 **Extended data table 4-1. Single grating stimulus set.**

1041 For the single component study, 17 unique tuning curves were measured, for a total of 225 unique  
 1042 stimulus conditions (figure 4-1 extended data). All featured single gratings presented at 100%  
 1043 contrast. Two direction tuning curves from  $-90^\circ$  to  $90^\circ$  relative to the preferred direction, in  $15^\circ$   
 1044 intervals, were collected along the optimal frequency-separable path (keeping the optimal spatial  
 1045 and temporal frequencies constant) and along the optimal velocity-separable path (keeping the op-  
 1046 timal velocity constant). Four direction tuning curves were collected at  $18^\circ$  intervals from  $-90^\circ$  to  
 1047  $90^\circ$  relative to the preferred direction: one at a higher and one at a lower than optimal temporal  
 1048 frequency while fixing the optimal spatial frequency, and two more at a high and a low spatial  
 1049 frequency while fixing the optimal temporal frequency.

1050 Two spatial frequency tuning curves, at 13 log-spaced values from 0.1 cycles/degree to 10 cy-

1051 cles/degree, were collected along the optimal frequency- and velocity-separable paths. Four spatial  
1052 frequency tuning curves, at 11 log-spaced values from 0.1 cycles/degree to 10 cycles/degree, were  
1053 collected at a high and low temporal frequency while maintaining the optimal direction. Two more  
1054 were collected at suboptimal directions, while maintaining the optimal temporal frequency.

1055 One temporal frequency tuning curve, at 13 log-spaced values from 0.1 cycles/second to 60 cy-  
1056 cles/second, was collected at the optimal direction and spatial frequency. Four temporal frequency  
1057 tuning curves, at 11 log-spaced values from 0.5 cycles/second to 60 cycles/second, were collected  
1058 at a high and low spatial frequency while maintaining the optimal direction. Two more were col-  
1059 lected at suboptimal directions, while maintaining the optimal spatial frequency. The “high” and  
1060 “low” non-preferred spatiotemporal frequencies used in suboptimal tuning curves were chosen to  
1061 maximally distinguish the frequency- and velocity-separable models.
